# Supplementary material for: Reversible metal-centered reduction empowers a Ni-Corrin to mimic F430
Source: Royal Society of Chemistry journal article supplement (doi:10.1039/d1cc02945b), 2021-01-01
Supplement: d1cc02945b1.pdf [file d1cc02945b1.pdf]

## Supporting Information

### Reversible Metal-Centered Reduction Empowers a Ni-Corrin to Mimic F430

Christopher Brenig,<sup>a</sup> Dr. Leila Mosberger,<sup>a</sup> Dr. Olivier Blaque,<sup>a</sup> Dr. Reinhard Kissner<sup>b</sup> and Prof. Dr. Felix Zelder<sup>a\*</sup>

<sup>a</sup>*Department of Chemistry, University of Zurich, Winterthurerstrasse 190, CH-8057 Zurich, Switzerland. Fax: +41 44 635 6803; E-mail: felix.zelder@chem.uzh.ch, [www.felix-zelder.net](http://www.felix-zelder.net).*

<sup>b</sup>*Institute of Inorganic Chemistry, ETH Zurich, Vladimir-Prelog-Weg 1-2, 8093 Zurich, Switzerland*

## Contents

|                                                                                                                     |     |
|---------------------------------------------------------------------------------------------------------------------|-----|
| <b>Materials and Methods.</b>                                                                                       | S4  |
| <b>Reaction Schemes.</b>                                                                                            | S8  |
| - <b>Scheme S1</b>                                                                                                  | S8  |
| Photo-oxygenolysis of <b>DCCbs</b> .                                                                                |     |
| - <b>Scheme S2</b>                                                                                                  | S8  |
| Synthesis of <b>5,6-DONibs<sup>+</sup></b> from <b>5,6-DODCCbs</b> .                                                |     |
| - <b>Scheme S3</b>                                                                                                  | S9  |
| Synthesis of <b>Ni-1<sup>+</sup></b> from <b>5,6-DONibs<sup>+</sup></b> .                                           |     |
| <b>Experimental Procedures.</b>                                                                                     | S9  |
| - <b>Co<sub>αβ</sub>-dicyano heptamethyl cobyrate (DCCbs).</b>                                                      | S9  |
| - <b>5,6-dioxo-5,6-<i>seco</i> Co<sub>αβ</sub>- dicyano heptamethyl cobyrate (5,6-DODCCbs).</b>                     | S9  |
| - <b>5,6-dioxo-5,6-<i>seco</i>-heptamethyl nibyrate perchlorate (5,6-DONibs[ClO<sub>4</sub>]).</b>                  | S10 |
| - <b>(5<i>R</i>, 6<i>S</i>)-5,6-dihydroxy-5,6-dihydro heptamethyl nibyrate perchlorate (Ni-1[ClO<sub>4</sub>]).</b> | S11 |
| <b>Atom Numbering.</b>                                                                                              | S12 |
| - <b>Figure S1</b>                                                                                                  | S12 |
| Atom numbering of <b>Ni-1<sup>+</sup></b> .                                                                         |     |
| <b>Chromatograms and Optical spectra.</b>                                                                           | S13 |
| - <b>Figure S2</b>                                                                                                  | S13 |
| UV/Vis spectrum of <b>5,6-DONibs<sup>+</sup></b> .                                                                  |     |
| - <b>Figure S3</b>                                                                                                  | S13 |
| UV/Vis spectrum of <b>Ni-1<sup>+</sup></b> .                                                                        |     |
| - <b>Figure S4</b>                                                                                                  | S14 |
| CD spectrum of <b>Ni-1<sup>+</sup></b> .                                                                            |     |
| - <b>Figure S5</b>                                                                                                  | S14 |
| LC-chromatogram and ESI-MS spectrum of <b>5,6-DONibs<sup>+</sup></b> .                                              |     |
| - <b>Figure S6</b>                                                                                                  | S14 |
| LC-chromatogram and ESI-MS spectrum of <b>Ni-1<sup>+</sup></b> .                                                    |     |
| <b>NMR spectra, table of NMR data and discussion.</b>                                                               | S15 |
| - <b>Figure S7</b>                                                                                                  | S15 |
| <sup>1</sup> H-NMR spectrum of <b>5,6-DONibs<sup>+</sup></b> .                                                      |     |
| - <b>Figure S8</b>                                                                                                  | S15 |
| <sup>1</sup> H-NMR spectrum of <b>Ni-1<sup>+</sup></b> .                                                            |     |
| - <b>Figure S9</b>                                                                                                  | S16 |
| <sup>1</sup> H- <sup>1</sup> H-pQF-COSY spectrum of <b>Ni-1<sup>+</sup></b> .                                       |     |
| - <b>Figure S10</b>                                                                                                 | S17 |
| <sup>1</sup> H- <sup>1</sup> H-ROESY spectrum of <b>Ni-1<sup>+</sup></b> .                                          |     |
| - <b>Figure S11</b>                                                                                                 | S18 |
| <sup>1</sup> H- <sup>13</sup> C-HSQC spectrum of <b>Ni-1<sup>+</sup></b> .                                          |     |
| - <b>Figure S12</b>                                                                                                 | S19 |
| <sup>1</sup> H- <sup>13</sup> C-HMBC spectrum of <b>Ni-1<sup>+</sup></b> .                                          |     |
| - <b>Table S1</b>                                                                                                   | S19 |
| <sup>1</sup> H-NMR chemical shifts and <sup>13</sup> C-NMR chemical shifts of <b>Ni-1<sup>+</sup></b> .             |     |

|                                                                                                  |     |
|--------------------------------------------------------------------------------------------------|-----|
| <b>EPR spectra.</b>                                                                              | S21 |
| - <b>Figure S13</b>                                                                              | S21 |
| EPR spectrum of <b>Ni-1</b> <sup>+</sup> in frozen MeCN at 110 K.                                |     |
| - <b>Figure S14</b>                                                                              | S21 |
| Double integration of the deconvoluted broad signal of <b>Ni-1</b> <sup>+</sup> .                |     |
| <b>Electrochemical and Spectroelectrochemical data.</b>                                          |     |
| - <b>Figure S15</b>                                                                              | S22 |
| Cyclic voltammograms of <b>Ni-1</b> <sup>+</sup> in DMF.                                         |     |
| - <b>Figure S16</b>                                                                              | S23 |
| Cyclic voltammograms of <b>Ni-1</b> <sup>+</sup> in CH <sub>3</sub> CN.                          |     |
| - <b>Figure S17</b>                                                                              | S23 |
| Cyclic voltammogram of <b>Ni-1</b> <sup>+</sup> recorded in the SEC cell.                        |     |
| - <b>Figure S18</b>                                                                              | S24 |
| UV/Vis spectroscopic changes upon reduction of <b>Ni-1</b> <sup>+</sup> in the SEC cell.         |     |
| - <b>Figure S19</b>                                                                              | S24 |
| Absorption spectra of <b>Ni-1</b> <sup>+</sup> and reduced <b>Ni-1</b> recorded in the SEC cell. |     |
| <b>Computational.</b>                                                                            | S25 |
| - <b>Figure S20</b>                                                                              | S25 |
| DFT optimized ground-state structure of <b>Ni-1</b> <sup>+</sup> .                               |     |
| - <b>Table S2</b>                                                                                | S26 |
| Coordinates of the DFT optimized ground-state structure of <b>Ni-1</b> <sup>+</sup> .            |     |
| - <b>Figure S21</b>                                                                              | S30 |
| DFT optimized ground-state structure of <b>Ni-1</b> .                                            |     |
| - <b>Table S3</b>                                                                                | S30 |
| Coordinates of the DFT optimized ground-state structure of <b>Ni-1</b> .                         |     |
| <b>References.</b>                                                                               | S35 |

## 1 . Materials and Methods

**General.** Chemicals were of reagent grade quality or better, obtained from *Sigma–Aldrich*, *Merck* or *Fluka* and used without further purification. Vitamin B<sub>12</sub> was a generous gift from *DSM Nutritional Products AG* (Basel/Switzerland) and Prof. em. B. Jaun (ETH, Switzerland). All solvents were of reagent, analytical, gradient or LC-MS grade, respectively and obtained from commercial suppliers. Bidistilled H<sub>2</sub>O was used in isolation and purification steps. H<sub>2</sub>O from a Milli-Q (*Merck-Millipore*) water purification system was used for LC–MS measurements and when indicated. Reactions were carried out under N<sub>2</sub> (g) or Ar (g) in oven-dried (100 °C) glass equipment and monitored for completion by analysing a small sample (after suitable workup) by TLC or LC–MS. Extracts were washed with brine, followed by H<sub>2</sub>O and dried over anhydrous Na<sub>2</sub>SO<sub>4</sub> or passed through oven-dried cotton. Evaporation of the solvents *in vacuo* was done with the rotary evaporator at given bath temperature and pressure. Chromatography: silica gel 60 (40–63 µm, *Merck*) with the indicated solvent system. Thin layer chromatography (TLC): TLC plates (*Merck*); silica gel 60 on aluminium with the indicated solvent system; the spots were visualized by UV light (254 and 366 nm). Preparative TLC: *Merck* TLC glass plates (0.5 · 250 · 250 mm), silica gel, using the indicated solvent system. The bands containing the compound of interest were scraped from the TLC plate and the silica gel was subjected to extraction with 6.0 mL of CH<sub>3</sub>OH containing 0.02 M NaClO<sub>4</sub> (2–3 min) in 15 mL glass centrifuge tubes. The suspension was subsequently centrifuged, and the liquid collected. The pellet was extracted again as mentioned above. The combined supernatants were diluted with H<sub>2</sub>O (20 mL) and CH<sub>3</sub>OH was removed *in vacuo*. Corrinoid material was isolated from the resulting aq. soln. using SPE. Preparative HPLC: *LaPrep* HPLC system (*VWR*) equipped with a PDA detector and a *Nucleodur 100-5* silica column (250 x 40 mm, *Machery–Nagel*). A gradient of CH<sub>2</sub>Cl<sub>2</sub> (0 min 2% A, 0–40 min % A, 40–40.1 min 100% A, 40.1–50 min 100% A) of CH<sub>3</sub>CN (solvent A) versus MeOH was applied using a flow rate of 60 mL min<sup>-1</sup>. Solid Phase Extraction: *SepPak*® RP18 cartridges (*Waters*). Compounds were dissolved in MeCN/H<sub>2</sub>O 1:9, transferred to the adsorbent, washed excessively with H<sub>2</sub>O, and eluted with MeCN. UV/Vis spectra: *Cary Series* spectrophotometer (*Agilent technologies*) using 1 cm quartz cuvettes (*Hellma Analytics*); samples in CH<sub>3</sub>OH, CHCl<sub>3</sub> or CH<sub>3</sub>CN;  $\lambda_{\max}$  (log $\epsilon$ ) in nm. CD spectroscopy: *JS 810* spectropolarimeter (*Jasco*) using 1 cm quartz cuvettes at a scan rate of 100 nm min<sup>-1</sup>. Temperature was maintained at 293 K with a *PFD-425S* temperature controller (*Jasco*);  $\lambda_{\max}(\theta)$ ,  $\lambda_{\min}(\theta)$  in nm (mdeg). IR spectra: *SpectrumTwo FT-IR Spectrometer* (*Perkin–Elmer*) equipped with a *Specac Golden Gate*<sup>TM</sup> ATR (attenuated total reflection)

accessory; applied as neat samples;  $1/\lambda$  in  $\text{cm}^{-1}$ . NMR spectroscopy in  $\text{CDCl}_3$  or  $\text{CD}_3\text{OD}$  at 500 MHz ( $^1\text{H}$ ) or 128 MHz ( $^{13}\text{C}$ ) and 298 or 278 K; *Avance III HD* 500 MHz spectrometer (*Bruker*) equipped with a *BOSS-II* shim system, a digital lock control unit, an *AMOS Control System*, a *DQD* unit, a *BVT3000* with a *BCU05* cooling unit and *GRASP Level II* for gradient spectroscopy, using a 5 mm BB inverse probehead ( $^1\text{H}$ ,  $^{13}\text{C}$ ) with an actively shielded z-gradient coil and *ATM* or a *Cryo* 5 mm QNP probe head ( $^{13}\text{C}$ ) with an actively shielded z-gradient coil and *ATM*;  $\delta$  in ppm rel. to  $\text{CDCl}_3$  ( $\delta^1\text{H}$  7.26,  $\delta^{13}\text{C}$  77.06; corresponds to TMS ( $\delta$  0.00)) or  $\text{CD}_3\text{OD}$  ( $\delta^1\text{H}$  3.31,  $\delta^{13}\text{C}$  49.03; corresponds to TMS ( $\delta$  0.00)),  $J$  in Hz. LC-MS: *Acquity* UPLC system (*Waters*) equipped with a PDA detector and an autosampler using an *ACQUITY UPLC BEH C18 Gravity* 1.7  $\mu\text{m}$  (2.1 mm  $\times$  50 mm) reverse phase column (*Waters*). The UPLC system was connected to a *HCT* ESI-MS spectrometer (*Bruker Daltonics*). A total volume of 1  $\mu\text{L}$  of an aq. sample soln. was analysed. A gradient (0 min 25% A, 0.1–4 min 100% A, 4.1–5 min 100% A) of  $\text{CH}_3\text{CN}$  (solvent A) versus an aq. soln. of 0.1%  $\text{HCOOH}$  (solvent B) was applied using a flow rate of 0.5  $\text{mL min}^{-1}$ . All solvents used were of LC-MS grade. ESI-MS: *Bruker Daltonics HCT* with an ESI source operated in positive or negative mode. Injection rate 3  $\mu\text{L min}^{-1}$ . Nebulizer P = 10 psi, dry gas flow rate 5  $\text{L min}^{-1}$ , dry gas T = 350  $^\circ\text{C}$ . All solvents used were of LCMS grade.

**Electrochemistry:** Cyclic voltammetry in analytical grade *N,N*-dimethylformamide (DMF) or MeCN (*Acros Organics*, kept over 3  $\text{\AA}$  molecular sieve) using a *PGSTAT128N* potentiostat/function generator (*Metrohm Autolab*). Working electrode: 7.1  $\text{mm}^2$  glassy carbon disk; counter electrode: 2 mm glassy carbon rod (both *Metrohm Schweiz AG*). The working electrode was polished with 0.3  $\mu\text{m}$  alumina powder/methanol paste and rinsed with methanol before each experiment. An Ag-wire was used as convenient pseudo reference electrode. It was experimentally confirmed during all voltammetry sessions that its potential difference to the ferrocenium/ferrocene ( $\text{Fc}^+/\text{Fc}$ ) couple was stable within 5 mV for the chosen electrolyte. Potential scales were converted to SHE based on the known electrode potentials of  $\text{Fc}^+/\text{Fc}$  in organic solvents and in  $\text{H}_2\text{O}$ , measured against the aqueous  $\text{Ag}/\text{AgCl}$ , sat. KCl electrode.<sup>S1</sup> Electrolyte soln. was prepared *in situ* by transferring  $\text{Bu}_4\text{NPF}_6$  (1.93 g) into the dry voltammetry vessel, which then was assembled into the air-proof voltametric cell. Under  $\text{N}_2$  (g) atmosphere (99.99%, dry), DMF (5.0 mL) was added by means of a gas-tight glass syringe. The resulting 0.1 M electrolyte soln. was de-aerated with  $\text{N}_2$  for 15 mins. A blank scan was taken at each scan rate to be examined, before 200  $\mu\text{L}$  of a soln. of **Ni-1** $[\text{ClO}_4]$  (5.0 mg) in DMF (0.5 mL) were added. The solution was de-aerated again for 15 mins, before three cyclic

scans in the indicated potential range were taken at a scan rate of 0.1 Vs<sup>-1</sup>. Electrocatalytic generation of acetonitrile from 1-chloroacetonitrile (CAN) was probed with cyclic voltammetry using the following conditions: **Ni-1**[ClO<sub>4</sub>] (2.5 mg, 0.42 mM) in DMF (5.0 mL) containing 0.1 M Bu<sub>4</sub>NPF<sub>6</sub>, working electrode: 2 mm glassy carbon rod; Counter electrode: Pt-disc; Quasi-reference electrode: Ag-wire, reference: Fc/Fc<sup>+</sup> couple, 0.1 V/ min; Start potential: – 0.3 V; Lower vertex potential: –1.3 V; Upper vertex potential: 0 V; Titrations with increasing amounts of CAN were conducted by addition of the respective amount of CAN into the bulk soln., followed by de-aeration with N<sub>2</sub> (15 mins.) and thorough mixing of the soln. using the counter electrode's rotation. All potentials given vs. SHE. DMF (99.9%, extra dry) was from *ACROS Organics*, Bu<sub>4</sub>NPF<sub>6</sub> and CAN (99.8%) were from *Sigma–Aldrich*.

**Spectroelectrochemistry:** A soln. of **Ni-1**[ClO<sub>4</sub>] (1.5 mg, 2.56 mM) in MeCN (0.5 mL, containing 0.6 M Bu<sub>4</sub>NPF<sub>6</sub>) was transferred into an optically transparent thin layer electrochemical cell (SEC) with a Pt-mesh working and counter electrode and a Ag quasi-reference electrode.<sup>S2</sup> The cell was equipped with CaF<sub>2</sub> windows. UV/Vis/NIR spectra (150–900 nm) were recorded using an *USB4000* optical fiber diode array spectrometer (*Ocean Optics*) with a *DH-2000-BAL* UV/Vis–NIR light source (*Mikropak*), applying an integration time of 10 ms. Cyclic voltammetry scans were performed with a *Vertex* potentiostat (*Ivium*) applying a start potential of 0 V vs. Ag-quasi-reference and a return potential of –1.5 V vs. Ag-quasi-reference at a scan rate of 10 mV/s. A trigger scheme was used to synchronize the electrochemical data acquisition (*IviumSoft*) and the spectroscopic measurements (*OO SpectraSuite*) using a four-channel digital delay/ pulse generator (*Stanford Research Systems, Inc.*). This measurement setup also enabled protection of the sample from irradiation by closing the shutter of the light source when no data was acquired. Additionally, platinum sputtered CaF<sub>2</sub> windows were used as neutral density filters to attenuate the light coming from the source via an optical fiber fitted with a collimating lens. The applied potential was calibrated externally using the Fc<sup>+</sup>/Fc redox couple in Bu<sub>4</sub>NPF<sub>6</sub> soln. (0.6 M) in MeCN (0.5 mL). All potentials given in V vs. SHE.

**EPR Experiments. Sample Preparation:** Reductions were carried out in MeCN containing 0.1 M Bu<sub>4</sub>NBF<sub>4</sub> or Bu<sub>4</sub>NPF<sub>6</sub> electrolytes, in a two-compartment electrolysis cell under nitrogen atmosphere. Compartments were separated by a polypropylene membrane grafted with anion exchanging quaternary ammonium groups. The cathode compartment contained **Ni-1**[ClO<sub>4</sub>] (5.0 mg) dissolved in electrolyte solution, a platinum sheet as working electrode and a silver wire as a pseudo-reference electrode. The anode compartment contained a coiled silver wire as

counter electrode and electrolyte solution. Prior to electrolysis, a cyclic voltammetry scan was performed to identify the peak potential of the first reduction wave of **Ni-1**<sup>+</sup>/ **Ni-1**. For electrolysis, the working potential was set slightly more negative (ca. 50 mV) than this peak potential, in order to avoid over-reduction which had been observed in cyclic voltammetry studies. During potentiostatic electrolysis, the current was monitored. The initial current dropped and asymptotically approached a limiting value after 10–15 minutes, which was interpreted as completion of the desired reduction. Reduction was accompanied by color change of the cathode compartment solution. MeCN of the reduced solution was partially evaporated by passing through a N<sub>2</sub> (g) in order to concentrate the sample. The solution was then collected with a gas tight syringe conditioned with N<sub>2</sub> (g) and brought into a glove box where it was transferred into a quartz EPR tube. The latter was sealed and taken out of the glove box. The sample was immediately frozen in N<sub>2</sub> (l) and kept there until it was mounted in the spectrometer. *EPR measurements*: The Dewar tube in the cavity of the 5000 CW X-band EPR spectrometer (*Magnettech*) was pre-cooled to 110 K. The sample was inserted, centered and conditioned to 110 K. Because of the low sample concentration, 21 to 30 scans were accumulated and averaged.

**DFT Calculations.** Density functional theory (DFT) calculations were carried out using the *Gaussian 09* program package.<sup>S3</sup> The hybrid functional B3LYP<sup>S4</sup> was chosen in association with the standard 6-31+G(d) basis set<sup>S5</sup> and the conductive polarizable continuum model (CPCM)<sup>S6,S7</sup> for the solvent effects (CH<sub>3</sub>CN). The optimized geometries of **Ni-1**<sup>+</sup> and **Ni-1** were confirmed to be potential energy minima by vibrational frequency calculations at the same level of theory (for cartesian coordinates see Tables S2 and S3).

## Reaction Schemes.

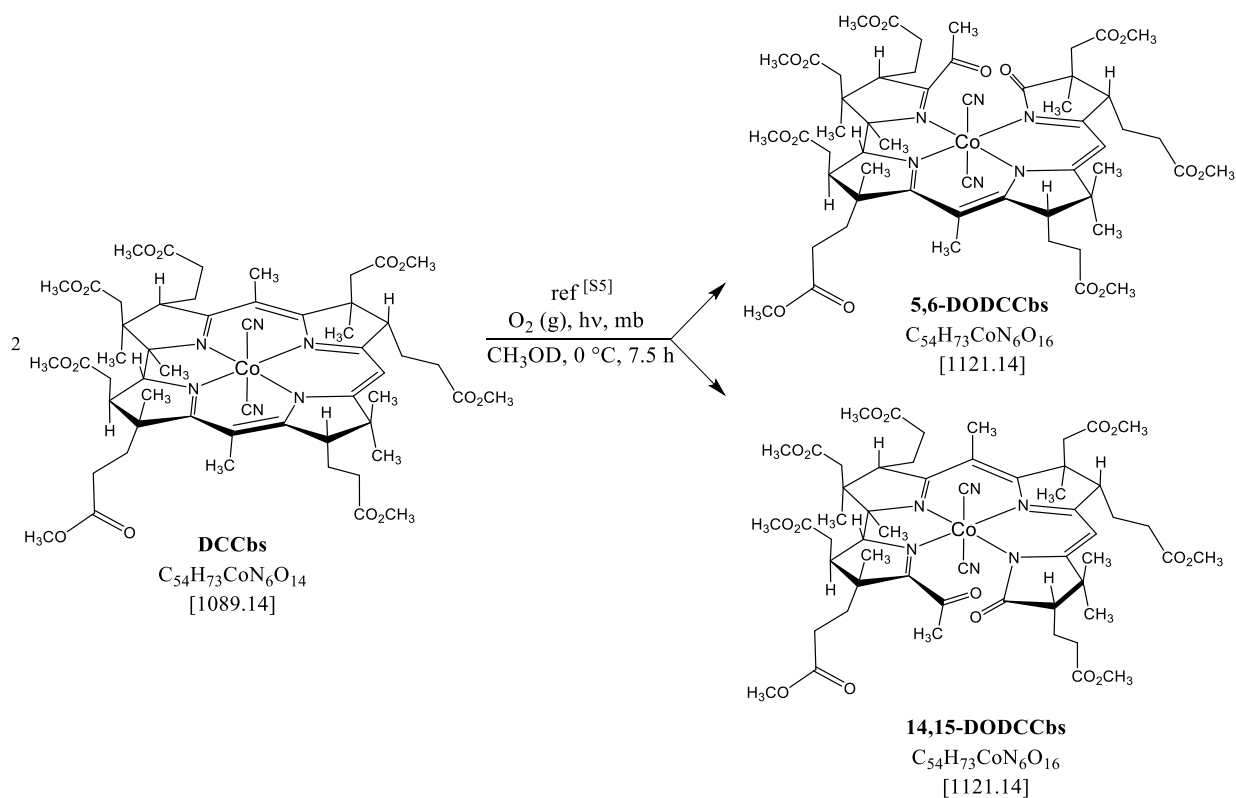

**Scheme S1.** Photo-oxygenolysis of DCCbs.

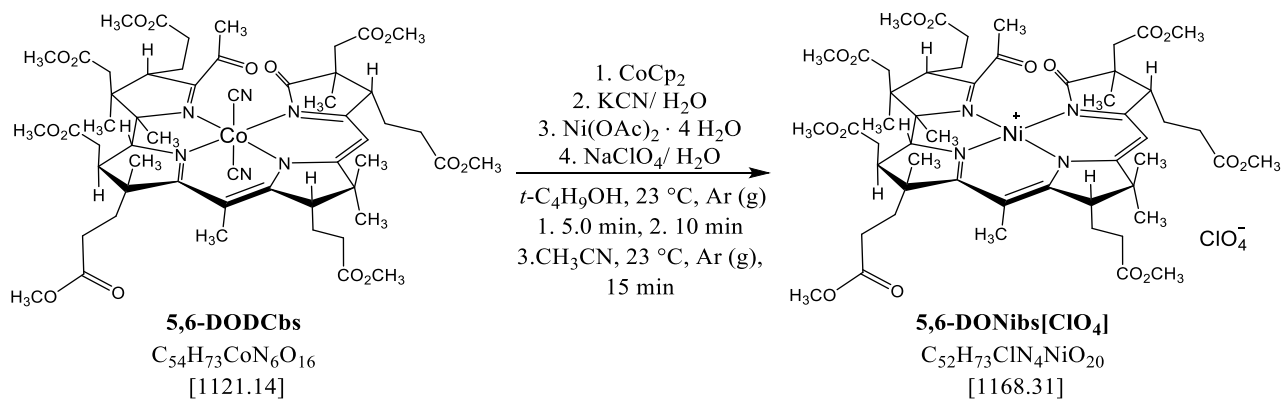

**Scheme S2.** Synthesis of 5,6-DONibs<sup>+</sup> from 5,6-DODCCbs.

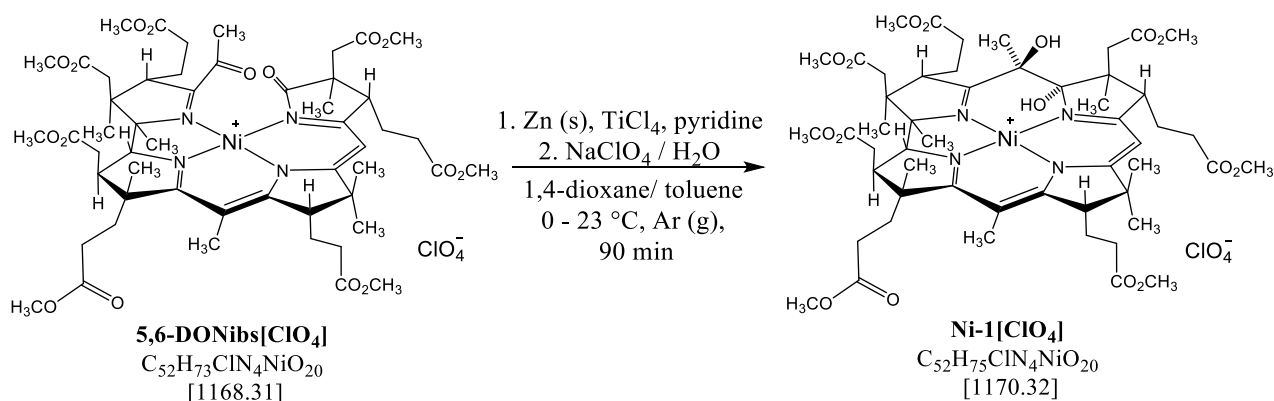

**Scheme S3.** Synthesis of Ni-1<sup>+</sup> from 5,6-DONibs<sup>+</sup>.

## Experimental Procedures.

### Co $\alpha\beta$ -dicyano heptamethyl cobyrinate (DCCbs).

**DCCbs** was synthesized using known literature procedures with the modifications introduced by Marques *et al.*,<sup>S8</sup> based on the original procedure by Werthemann.<sup>S9</sup> in 87 % yield. After column chromatography (50 g SiO<sub>2</sub>, 316 mg KCN, CH<sub>2</sub>Cl<sub>2</sub>/CH<sub>3</sub>OH 10:0.1 – 10:0.3, gradually in 0.5 % steps), DCCbs was obtained in 87% yield. *Co $\alpha\beta$ -dicyano heptamethyl cobyrinate*: TLC:  $R_f$  = 0.74 (EtOAc/CH<sub>3</sub>OH 9:1). UV/Vis (CH<sub>3</sub>OH,  $c$  = 5.4 · 10<sup>-5</sup> M): 280 (3.90), 313 (3.83), 369 (4.33), 420 (3.24), 510 (*sh.*, 3.45), 545 (3.78), 585 (3.86). IR: 3446<sub>w</sub>, 2953<sub>w</sub> (C–H), 2123<sub>w</sub> (C≡N), 1727<sub>s</sub> (C=O), 1580<sub>m</sub>, 1501<sub>s</sub>, 1435<sub>m</sub>, 1402<sub>m</sub>, 1367<sub>m</sub>, 1353<sub>m</sub>, 1300<sub>m</sub>, 1198<sub>s</sub> (C–O), 1150<sub>s</sub>, 1104<sub>s</sub>, 1003<sub>m</sub>, 884<sub>w</sub>, 858<sub>w</sub>, 804<sub>w</sub>. <sup>1</sup>H-NMR (CD<sub>3</sub>OD,  $c$  = 5.4 · 10<sup>-3</sup> M): 5.81 (*s*, HC10), 3.86 (*d*,  $J$  = 10.5, HC19), 3.84–3.82 (*m*, HC3), 3.81 (*s*, H<sub>3</sub>CO<sub>2</sub>C182), 3.76 (*s*, H<sub>3</sub>CO<sub>2</sub>C22), 3.75 (*s*, H<sub>3</sub>CO<sub>2</sub>C72), 3.73 (2 *s*, H<sub>3</sub>CO<sub>2</sub>C33, H<sub>3</sub>CO<sub>2</sub>C173), 3.71 (*s*, H<sub>3</sub>CO<sub>2</sub>C83), 3.65 (*s*, H<sub>3</sub>CO<sub>2</sub>C133), 3.47 (*dd*,  $J$  = 8.0, 4.9, HC8), 3.24 (*dd*,  $J$  = 6.0, 4.4, HC13), 2.90 (*dd*,  $J$  = 10.6, 3.6, HC18), 2.85–2.75 (*m*,  $H_a$  of H<sub>2</sub>C71, H<sub>2</sub>C181), 2.74–2.57 (*m*,  $H_a$  of H<sub>2</sub>C21, H<sub>2</sub>C172, H<sub>2</sub>C32), 2.57–2.38 (*m*,  $H_b$  of H<sub>2</sub>C71, H<sub>2</sub>C21,  $H_a$  of H<sub>2</sub>C171, H<sub>2</sub>C82), 2.34 (*s*, H<sub>3</sub>C151), 2.32–2.21 (*m*,  $H_b$  of H<sub>2</sub>C172, H<sub>2</sub>C132,  $H_a$  of H<sub>2</sub>C81, H<sub>2</sub>C131, H<sub>2</sub>C31) superimposed by 2.29 (*s*, H<sub>3</sub>C51), 1.91–1.82 (*m*,  $H_b$  of H<sub>2</sub>C131, H<sub>2</sub>C171), 1.74 (*dt*,  $J$  = 8.5, 4.5,  $H_b$  of H<sub>2</sub>C81), 1.66 (*s*, H<sub>3</sub>C7A), 1.53 (*s*, H<sub>3</sub>C1A), 1.46–1.45 (2 *s*, H<sub>3</sub>C2A, H<sub>3</sub>C12A), 1.32 (*s*, H<sub>3</sub>C17B); 1.32 (*s*, H<sub>3</sub>C12B) LC–MS (MS<sup>+</sup>):  $R_t$  = 2.40 min,  $m/z$  = 1062.53 (100, [M–CN]<sup>+</sup>,  $m/z_{calc}$ : 1062.45 for C<sub>53</sub>H<sub>73</sub>CoN<sub>5</sub>O<sub>14</sub><sup>+</sup>).

### 5,6-dioxo-5,6-*seco* Co $\alpha\beta$ - dicyano heptamethyl cobyrinate (5,6-DODCCbs).

Photo-oxidation of **DCCbs** was performed based on a procedure developed by Kräutler and Stepánek.<sup>S10</sup> **DCCbs** (179 mg, 164  $\mu$ mol) and methylene blue (1.90 mg, 5.94  $\mu$ mol, 3.8 mol-%) were dissolved in CH<sub>3</sub>OD (10 mL) and transferred into a photoreactor. The water-cooled soln. was purged with O<sub>2</sub> prior to irradiation. The oxygen saturated mixture was irradiated with a 240 W halogen lamp for 7.5 h. The solvent was evaporated *in vacuo* (300 mbar, 40 °C).

Desired **5,6-DODCCbs** was separated from its region-isomeric counterpart 14,15-dioxo Co $\alpha\beta$ -dicyano heptamethyl cobyrinate (**14,15-DODCCbs**) as well as some unreacted starting material by preparative HPLC. Pure fractions were pooled, and the solvent was evaporated *in vacuo* (650 mbar, 40 °C). The residues of **5,6-DODCCbs** and **14,15-DODCCbs** were dissolved in EtOAc (0.2 mL), respectively, and *n*-hexane (3.0 mL) was added. The resulting precipitates were vortexed and centrifuged (3500 rpm, 15 min). The solvent was decanted and both solids were dried under high vacuum yielding **5,6-DODCCbs** (75.0 mg, 66.9  $\mu$ mol, 41 %) as a red solid and **14,15-DODCCbs** (60.7 mg, 54.1  $\mu$ mol, 33%) as a red-brown solid. **5,6-dioxo-5,6-seco Co $\alpha\beta$ -dicyano heptamethyl cobyrinate**: UV/Vis (CHCl<sub>3</sub>,  $c = 4.5 \cdot 10^{-5}$  M): 276 (*sh.*, 3.99), 392 (*sh.*, 3.90), 330 (3.96), 367 (*sh.*, 3.45), 490 (*br.*, 3.92). IR: 3446<sub>w</sub>, 2954<sub>w</sub> (C–H), 2163<sub>w</sub>, 2126<sub>w</sub> (C $\equiv$ N), 1725<sub>s</sub> (C=O), 1634<sub>w</sub>, 1556<sub>w</sub>, 1531<sub>w</sub>, 1498<sub>m</sub>, 1436<sub>m</sub>, 1402<sub>m</sub>, 1372<sub>m</sub>, 1307<sub>m</sub>, 1172<sub>s</sub>, 1100<sub>s</sub>, 1048<sub>m</sub>, 1006<sub>s</sub>, 887<sub>w</sub>, 849<sub>w</sub>, 819<sub>w</sub>. <sup>1</sup>H-NMR (CDCl<sub>3</sub>,  $c = 4.5 \cdot 10^{-3}$  M): 5.55 (*s*, HC10), 3.81–3.65 (*m*, HC19, HC3) superimposed by 3.78 (*s*, H<sub>3</sub>CO<sub>2</sub>C), 3.74 (*s*, H<sub>3</sub>CO<sub>2</sub>C), 3.72 (*s*, H<sub>3</sub>CO<sub>2</sub>C), 3.69 (2 *s*, 2 H<sub>3</sub>CO<sub>2</sub>C) and 3.67 (*s*, H<sub>3</sub>CO<sub>2</sub>C), 3.58 (*s*, H<sub>3</sub>CO<sub>2</sub>C), 3.27 (*dd*,  $J = 8.6, 3.2, 1$  H, corrin-CH), 3.00 (*app. d*,  $J = 4.2, 1$  H, corrin-CH), 2.91 (*t*,  $J = 4.9$ , corrin-CH), 2.77–2.28 (*m*, 12 corrin-CH and corrin-CH<sub>2</sub>) superimposed by 2.66 (*s*, H<sub>3</sub>C51), 2.25–2.18 (*m*, 7 corrin-CH and corrin-CH<sub>2</sub>) superimposed by 2.21 (*s*, H<sub>3</sub>C151) and 1.99 (*s*, corrin-CH<sub>3</sub>), 1.76–1.63 (*m*, 4 corrin-CH<sub>2</sub>), 1.30 (*s*, corrin-CH<sub>3</sub>), 1.26 (*s*, corrin-CH<sub>3</sub>), 1.24 (*s*, corrin-CH<sub>3</sub>), 1.20 (*s*, corrin-CH<sub>3</sub>), 1.00 (*s*, corrin-CH<sub>3</sub>) LC–MS (MS<sup>+</sup>) : R<sub>t</sub> = 2.20 min,  $m/z$  = 1094.52 (100, [M – CN]<sup>+</sup>,  $m/z_{\text{calc}}$ : 1094.44 for C<sub>53</sub>H<sub>73</sub>CoN<sub>5</sub>O<sub>16</sub><sup>+</sup>).

#### **5,6-dioxo-5,6-seco-heptamethyl nibyrinate perchlorate (5,6-DONibs[ClO<sub>4</sub>]).**

In a *Schlenk* tube, **5,6-DODCCbs** (32.0 mg, 28.5  $\mu$ mol) was dissolved in <sup>t</sup>BuOH (5.0 mL) at 23 °C. The soln. was degassed thoroughly by freeze-pump-thaw cycling (3 cycles) before CoCp<sub>2</sub> (10.8 mg, 57.1  $\mu$ mol, 2.0 equiv.) was added under Ar (g) counterflow. The soln. turned dark immediately and was stirred under Ar (g) at 23 °C for 5.0 min, before KCN (250 mg, 3.84 mmol, 135 equiv.) was added to the mixture followed by H<sub>2</sub>O (2.0 mL), upon which the soln. turned bright yellow. After stirring at 23 °C for further 10 min, reaction control by LC–MS showed complete consumption of the starting material. The mixture was filtered through *Celite*® plug and the solid residue was washed with a few mL of <sup>t</sup>BuOH/H<sub>2</sub>O (20 mL). The filtrates were combined and <sup>t</sup>BuOH was evaporated *in vacuo* (30 mbar, 20 °C). NaClO<sub>4</sub> (2M in H<sub>2</sub>O) was added to the aq. phase which then was extracted with CH<sub>2</sub>Cl<sub>2</sub> (3  $\times$  20 mL). The combined organic phases were filtered through cotton and the solvent was evaporated *in vacuo* (300 mbar, 21 °C) to approx. 1/10 of its original volume. The residual solvent was removed in a stream of Ar (g) until a yellow solid was observed. Metal-free 5,6-dioxo heptamethyl hydrogenobyrinate (**X**) was used without further purification in the re-metallation step. The yellow residue was dissolved in MeCN (anhydr., 5.0 mL) and the soln. was degassed by purging with Ar (g) for 15 min, before Ni(OAc)<sub>2</sub>  $\cdot$  4 H<sub>2</sub>O (72.1mg, 290.0  $\mu$ mol, 10 equiv.) was added. The yellow soln. turned orange immediately and was stirred under Ar (g) until reaction control by UPLC-MS showed full conversion of starting material (15 min). Then, H<sub>2</sub>O (10 mL) and NaClO<sub>4</sub> (2M in H<sub>2</sub>O, 5.0 mL) was added. CH<sub>3</sub>CN was evaporated *in vacuo* (50 mbar, 20 °C) and the remaining aq. phase was extracted with CH<sub>2</sub>Cl<sub>2</sub> (3  $\times$  15 mL). The solvent of the combined organic phases was evaporated *in vacuo* (450 mbar, 21 °C). The remaining solid was

dissolved in CH<sub>3</sub>CN (1.5 mL) and lyophilized overnight to yield the perchlorate salt **5,6-DONibs[ClO<sub>4</sub>]** (36.0 mg, 30.0 μmol, *quant.*) as an orange solid. *5,6-dioxo-5,6-seco-heptamethyl nibyrinate perchlorate*: UV/Vis (CH<sub>3</sub>CN,  $c = 2.5 \cdot 10^{-5}$  M): 259 (3.88), 276 (3.93), 318 (*sh.*, 3.71), 358 (*sh.*, 3.54), 459 (3.79). <sup>1</sup>H-NMR (CDCl<sub>3</sub>,  $c = 4.6 \cdot 10^{-3}$  M): 5.74 (*s*, HC10), 3.93 (*d*,  $J = 11.0$ , HC19), 3.75 (*s*, OCH<sub>3</sub>), 3.73 (*s*, OCH<sub>3</sub>), 3.73–3.65 (*m*, corrin-CH) superimposed by 3.70, 3.71 (2 *s*, 2 OCH<sub>3</sub>), 3.68 (*s*, OCH<sub>3</sub>), 3.66 (*s*, OCH<sub>3</sub>) and 3.64 (*s*, OCH<sub>3</sub>), 3.04–3.01 (*m*, corrin-CH), 2.99 (*s*, H<sub>3</sub>C51), 2.95 (*t*,  $J = 5.1$ , corrin-CH), 2.89–2.84 (*m*, corrin-CH), 2.77–2.70 (*m*, 2 corrin-CH), 2.62 (*d*,  $J = 14.7$ , corrin-CH), 2.59–2.45 (*m*, corrin-CH, 2 corrin-CH<sub>2</sub>), 2.44–2.39 (*m*, corrin-CH<sub>2</sub>), 2.20 (*s*, H<sub>3</sub>C151), 2.11 (*s*, corrin-CH<sub>3</sub>), 2.09–2.03 (*m*, corrin-CH<sub>2</sub>), 2.00–1.85 (*m*, 3 corrin-CH<sub>2</sub>), 1.75–1.66 (*m*, 2 corrin-CH<sub>2</sub>), 1.39 (*s*, corrin-CH<sub>3</sub>), 1.32, 1.31 (2 superimposed *s*, 2 corrin-CH<sub>3</sub>), 1.19 (*s*, corrin-CH<sub>3</sub>), 0.97 (*s*, corrin-CH<sub>3</sub>). LC–MS (MS<sup>+</sup>):  $R_t = 2.49$  min,  $m/z = 1067.54$  (100,  $M^+$ ,  $m/z_{\text{calc}}$ : 1067.44 for C<sub>52</sub>H<sub>73</sub>N<sub>4</sub>NiO<sub>16</sub><sup>+</sup>).

**(5*R*, 6*S*)-5,6-dihydroxy-5,6-dihydro heptamethyl nibyrinate perchlorate (Ni-1[ClO<sub>4</sub>]).**

In a *Schlenk* tube, Zn dust (60.0 mg, 0.91 mmol, 30 equiv.), previously dried in high vacuum (100 °C) was suspended in dioxane (anhydr., 2.0 mL). The suspension was cooled to 0 °C in an ice–water bath, before TiCl<sub>4</sub> (1.0 M in toluene, 0.48 mL, 0.48 mmol, 16 equiv.) was added under Ar (g) at 0 °C. To the resulting yellow mixture, pyridine (15.0 μL, 0.19 mmol, 6.0 equiv.) was added, resulting in a colour change to dark brown. The resulting mixture was refluxed (110 °C) for 1 h before it was cooled down to 23 °C. To the resultant black slurry, **5,6-DONibs[ClO<sub>4</sub>]** (36.8 mg, 0.03 mmol, 1.0 equiv.) was added as a soln. in dioxane (anhydr., 1.0 mL) under Ar (g) over the course of 1h. The soln. turned brighter gradually and was stirred for another 30 min, before reaction control via LC–MS confirmed full conversion of the starting material. A saturated soln. of NaHCO<sub>3</sub> (10 mL) was added and the resulting pale grey slurry was filtered through *Celite*<sup>®</sup>. The residue and the aq. phase were thoroughly extracted with CH<sub>2</sub>Cl<sub>2</sub> (3 x 15 mL), the combined org. phase was dried by filtration through cotton, and the solvent was removed *in vacuo* (380 mbar, 20 °C). The residue was purified with prep. TLC (5 % MeOH ([NaClO<sub>4</sub>] = 0.02 M) vs. CH<sub>2</sub>Cl<sub>2</sub>) resulting in separation of a major yellow band, containing the desired ring-closed product **Ni-1**<sup>+</sup>. The band was isolated, and after evaporation of the solvents *in vacuo* (50 mbar, 20 °C), the remaining aq. soln. was extracted using SPE. The absorbed product was washed with H<sub>2</sub>O ([NaClO<sub>4</sub>] = 0.2 M, 10 mL), followed by H<sub>2</sub>O (10 mL) and eluted with CH<sub>3</sub>CN (2.5 mL). The soln. was lyophilized overnight to obtain **Ni-1[ClO<sub>4</sub>]** (12.0 mg, 0.01 mmol, 33 %). *(5R, 6S)-5,6-dihydroxy-5,6-dihydro heptamethyl nibyrinate perchlorate*: UV/Vis (CH<sub>3</sub>CN,  $c = 7.6 \cdot 10^{-5}$  M): 263 (3.86), 277 (3.87), 316 (*sh.*, 3.52), 366 (*sh.*, 3.36), 447 (3.75). CD (CH<sub>3</sub>CN,  $c = 3.8 \cdot 10^{-4}$  M):  $\lambda_{\text{min}}$  222 (–10.8),  $\lambda_{\text{min}}$  249 (–5.9),  $\lambda_{\text{min}}$  279 (–6.8),  $\lambda_{\text{max}}$  318 (7.8),  $\lambda_{\text{max}}$  370 (1.9),  $\lambda_{\text{min}}$  433 (–21.9),  $\lambda_{\text{max}}$  509 (10.2). <sup>1</sup>H-NMR (CDCl<sub>3</sub>,  $c = 2.3 \cdot 10^{-3}$  M): 5.57 (*s*, HC10), 3.76–3.65 (*m*, HC19) superimposed by 3.74 (*s*, OCH<sub>3</sub>), 3.73 (*s*, OCH<sub>3</sub>), 3.70 (2 *s*, 2 OCH<sub>3</sub>), 3.68 (2 *s*, 2 OCH<sub>3</sub>) and 3.66 (*s*, 2 OCH<sub>3</sub>), 3.21 (*d*,  $J = 16.7$ , HC3, HC8), 2.98–2.65 (*m*, HC13, HC18, H<sub>2</sub>C181), 2.49, 2.48 (2 *s*, HOC5, HOC6), 2.59–2.55 (*m*, H<sub>a</sub> of H<sub>2</sub>C21 and H<sub>2</sub>C131), 2.22–2.17 (*m*, H<sub>b</sub> of H<sub>2</sub>C21) superimposed by 2.20 (*s*, H<sub>3</sub>C151), 2.11–2.05 (*m*, H<sub>a</sub> of H<sub>2</sub>C31 and H<sub>2</sub>C7), 1.75–1.71 (*m*, H<sub>b</sub> of H<sub>2</sub>C131), 1.67–1.60 (*m*, H<sub>b</sub> of H<sub>2</sub>C31, H<sub>a</sub> of H<sub>2</sub>C81) superimposed by 1.63 (*s*, H<sub>3</sub>C51), 1.56 (*s*, H<sub>3</sub>C1A), 1.45–1.40 (*m*, H<sub>b</sub> of H<sub>2</sub>C81, H<sub>a</sub> of H<sub>2</sub>C172), 1.39–1.36 (*m*, H<sub>2</sub>C32), 1.35–1.30 (*m*, H<sub>b</sub> of H<sub>2</sub>C71, H<sub>a</sub> of H<sub>2</sub>C171) superimposed by 1.32 (*s*, H<sub>3</sub>C7A), 1.30–1.20 (*m*, H<sub>b</sub> of H<sub>2</sub>C171, H<sub>2</sub>C132)

superimposed by 1.24 ( $H_3C12A$ ), 1.18–1.16 ( $m$ ,  $H_a$  of  $H_2C172$ ), 1.03–0.99 ( $m$ ,  $H_2C82$ ) superimposed by 1.01 ( $s$ ,  $H_3C2A$ ), 0.94 ( $s$ ,  $H_3C12B$ ).  $^{13}C$ -NMR ( $CDCl_3$ ): 181.0 (C11), 173.8 (C83), 173.0 (C22), 172.6 (C133, C33), 172.3 (C72, C173), 171.9 (C16), 171.0 (C182), 159.8 (C14), 158.6 (C4), 121.4 (C6), 107.5 (C15), 92.8 (C10), 76.0 (C5), 70.6 (C19), 58.5 (C3), 55.2 (C8, C18), 52.3 (OC25, OC36, OC86, OC75, OC136, OC176, OC185), 49.9 (C1), 49.5 (C12), 47.9 (C2, C7), 44.9 (C2), 40.2 (C181), 34.7 (C172), 34.5 (C17), 34.3 (C172), 31.2 (C131), 30.8 (C21), 30.7 (C13, C71), 30.1 (C82), 29.8 (C12A), 28.9 (C171), 27.9 (C32), 24.7 (C31), 23.8 (C51), 21.8 (C1A), 20.5 (C7A, C12B), 19.6 (C81), 18.0 (C17B), 15.2 (C151), 13.8 (C2A). LC-MS ( $MS^+$ ):  $R_t = 2.65$  min,  $m/z = 1069.61$  (100,  $M^+$ ,  $m/z_{calc}$ : 1069.45 for  $C_{52}H_{75}N_4NiO_{16}^+$ ).

### Atom Numbering.

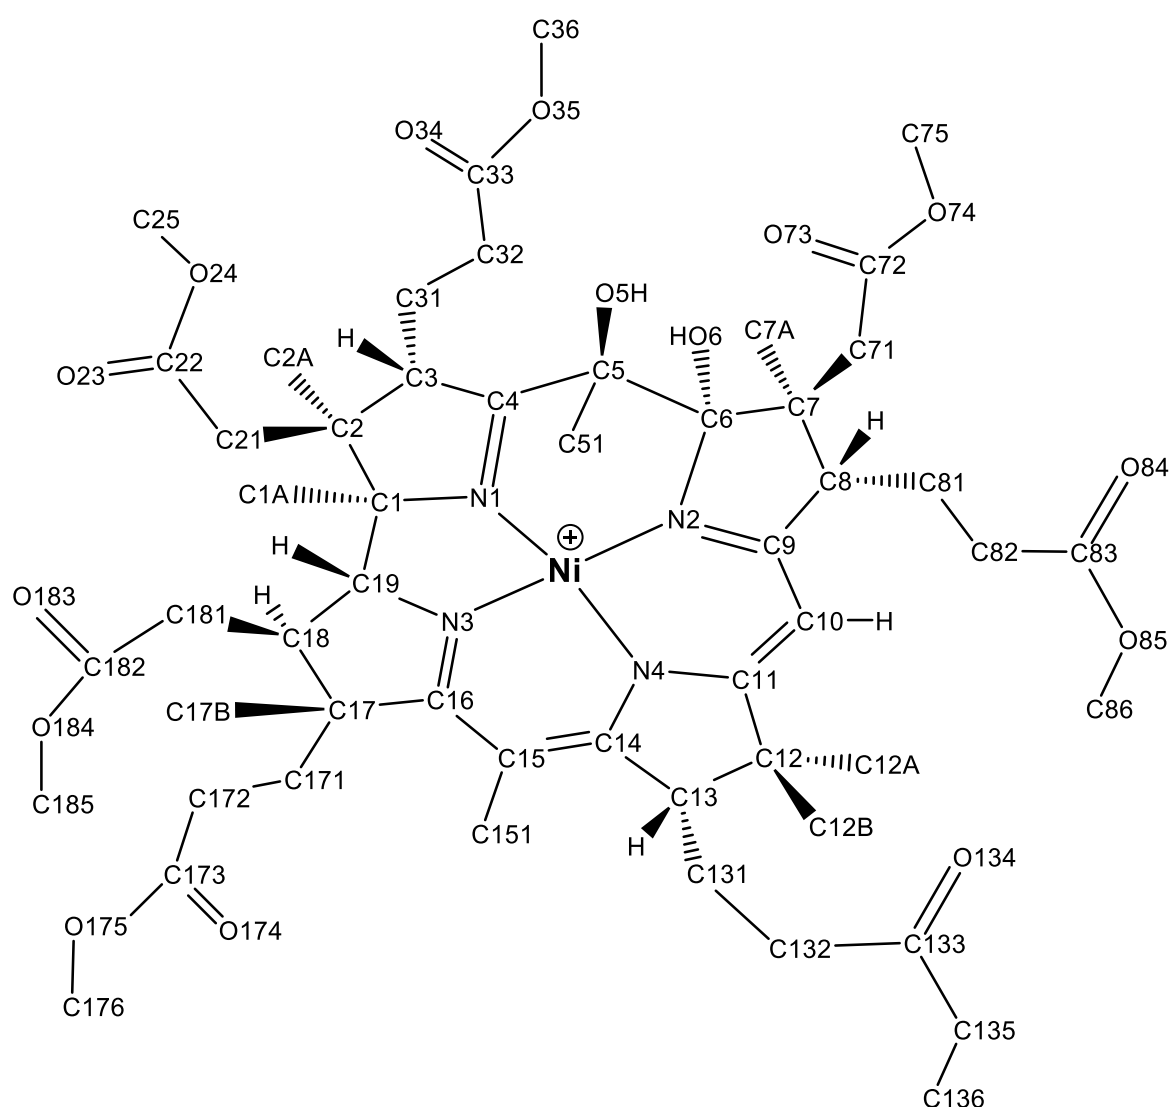

**Figure S1.** Atom numbering of Ni-1<sup>+</sup>.

## Chromatograms and Optical spectra.

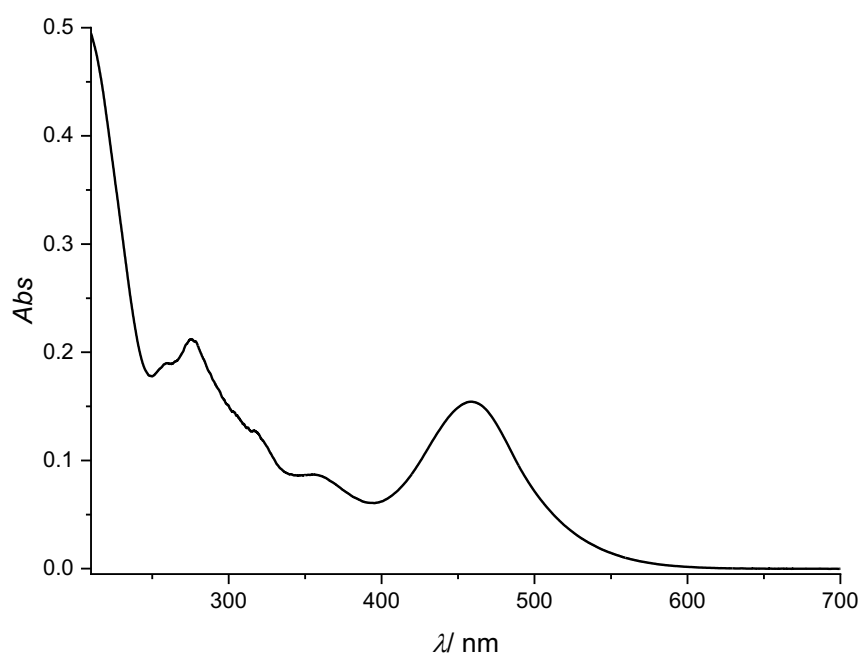

**Figure S2.** UV/Vis spectrum of **5,6-DONibs<sup>+</sup>** (CH<sub>3</sub>CN, c = 2.5 · 10<sup>-5</sup> M).

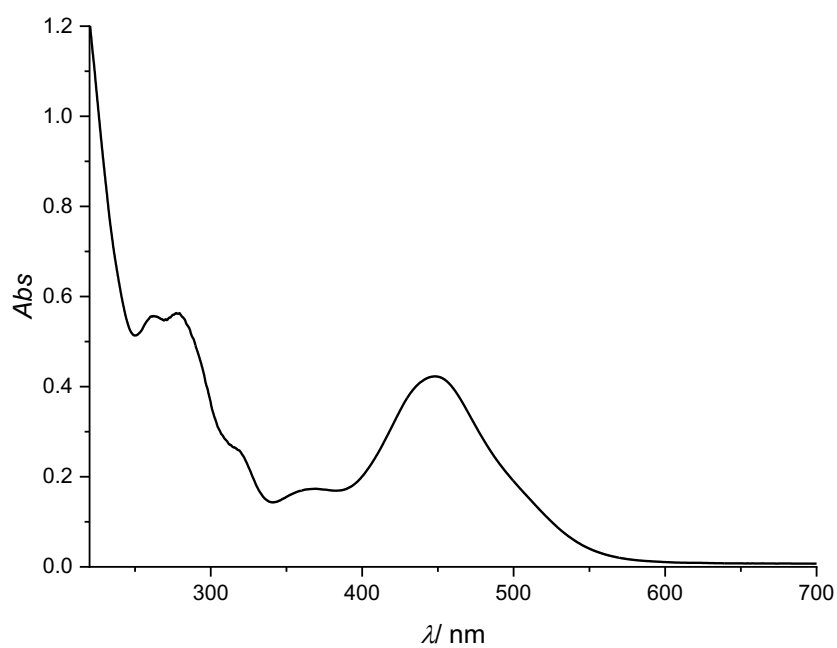

**Figure S3.** UV/Vis spectrum of **Ni-1<sup>+</sup>** (CH<sub>3</sub>CN, c = 2.5 · 10<sup>-5</sup> M).

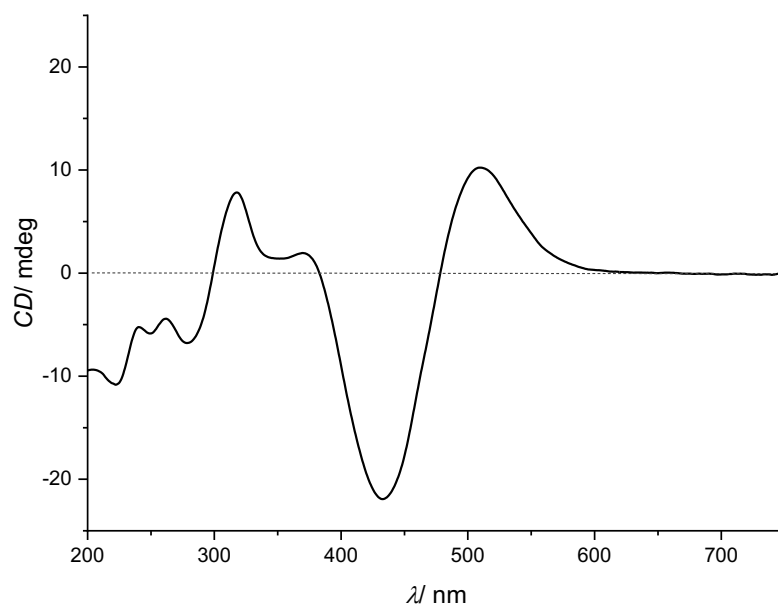

**Figure S4.** CD spectrum of **Ni-1**<sup>+</sup> (CH<sub>3</sub>CN,  $c = 3.8 \cdot 10^{-4}$  M).

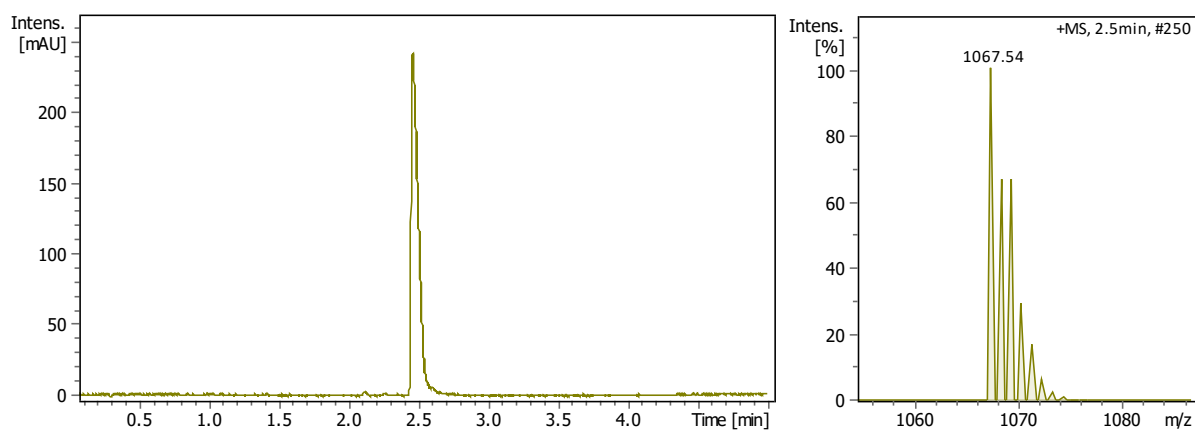

**Figure S5.** UHPL chromatogram of **5,6-DONibs**<sup>+</sup> (H<sub>2</sub>O ([HCOOH] = 0.1%)/MeCN, 200–480 nm). *Right:* Section of the ESI-MS spectrum of **5,6-DONibs**<sup>+</sup>.

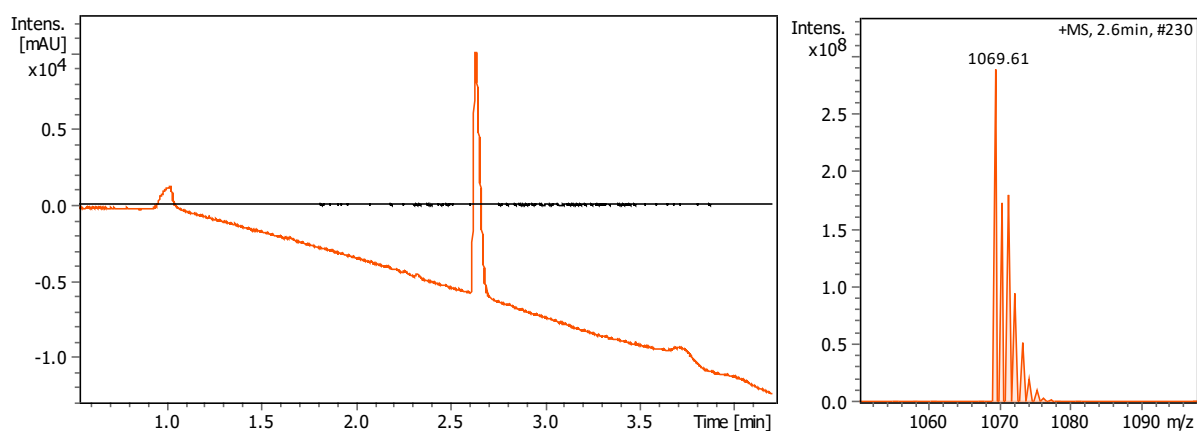

**Figure S6.** UHPL chromatogram of **Ni-1**<sup>+</sup> (H<sub>2</sub>O ([HCOOH] = 0.1%)/MeCN, 200–480 nm). *Right:* Section of the ESI-MS spectrum of **Ni-1**<sup>+</sup>.

## NMR spectra, table of NMR data and discussion.

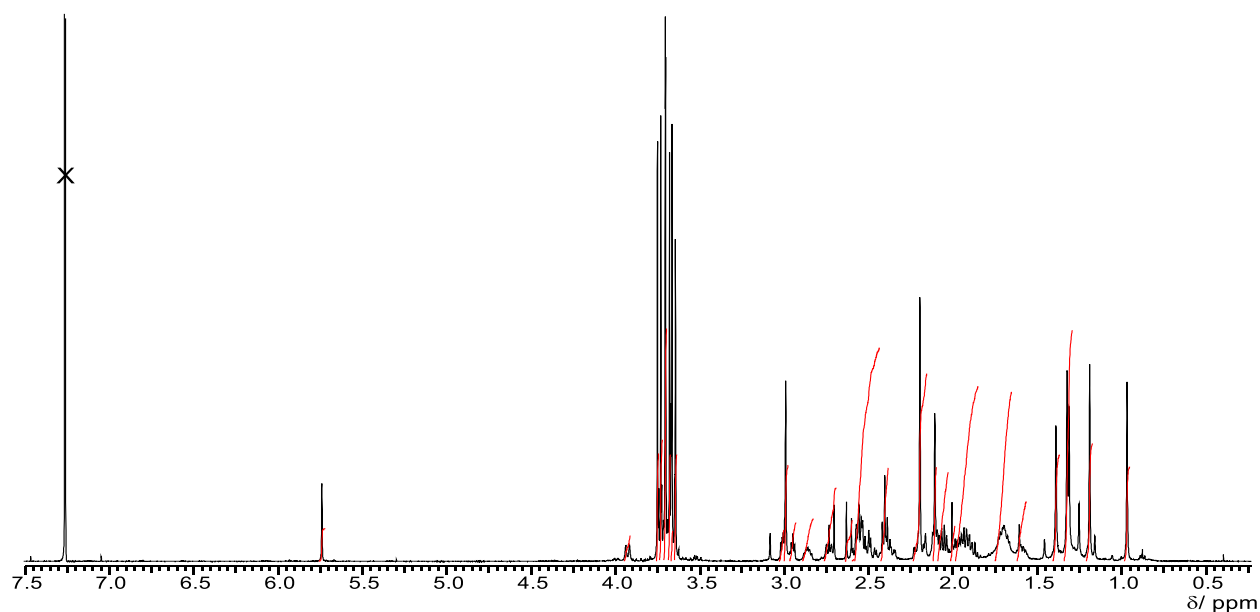

**Figure S7.**  $^1\text{H}$ -NMR spectrum of **5,6-DONibs<sup>+</sup>** (500 MHz,  $\text{CDCl}_3$ , 298 K,  $4.6 \cdot 10^{-3}$  M).

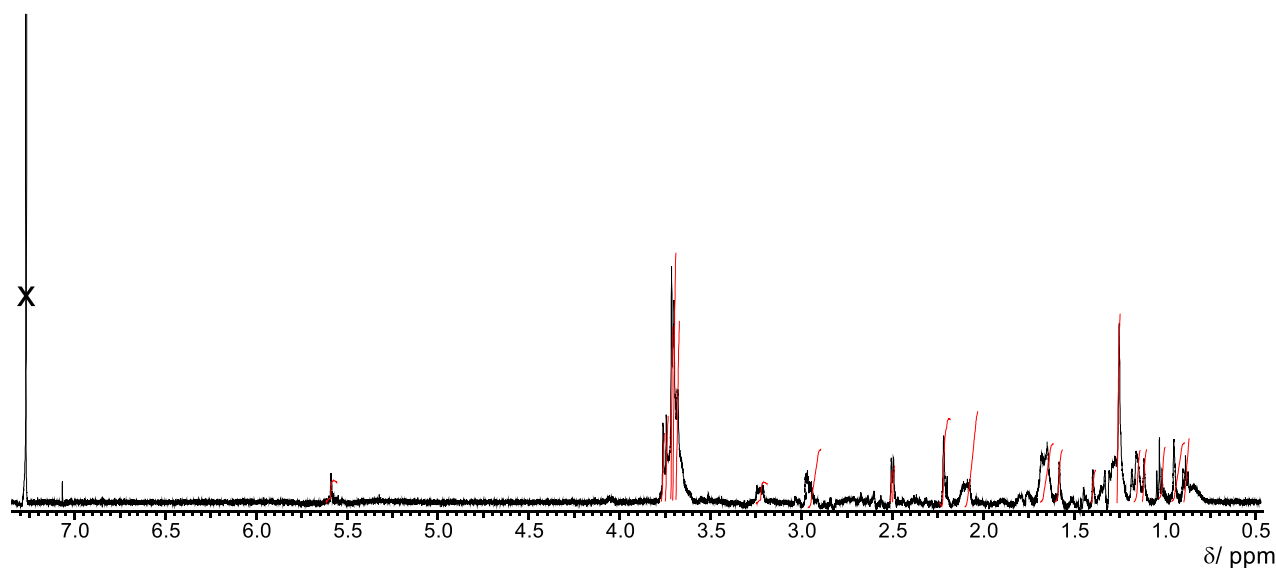

**Figure S8.**  $^1\text{H}$ -NMR spectrum of **Ni-1<sup>+</sup>** (500 MHz,  $\text{CDCl}_3$ , 298 K,  $2.2 \cdot 10^{-3}$  M).

*Comment:* Highfield shifts ( $\Delta\delta$  0.3–1.3 ppm) were detected for the proton at C19 (3.36 ppm) as well as for the C51 methyl group (1.63 ppm), located in vicinity of the newly formed *trans*-diol unit in **Ni-1<sup>+</sup>**, when compared to the  $^1\text{H}$ -NMR signals found for **5,6-DONibs<sup>+</sup>**. The signals of the two adjacent hydroxy groups were located at 2.46 and 2.47 ppm and, thus, display typical shifts for tertiary alcohol groups.  $^1\text{H}$ - $^{13}\text{C}$ -HMBC spectroscopy, a particularly useful tool applied earlier for the structural determination of related 5,6-dihydroxy-nibalamine,<sup>S11</sup> allowed for univocal establishment of the newly formed bond between C5 and C6 in **Ni-1<sup>+</sup>** *via* correlations between the C51 methyl group protons and the beforementioned carbons, located at 76.0 and 121.4 ppm, respectively.

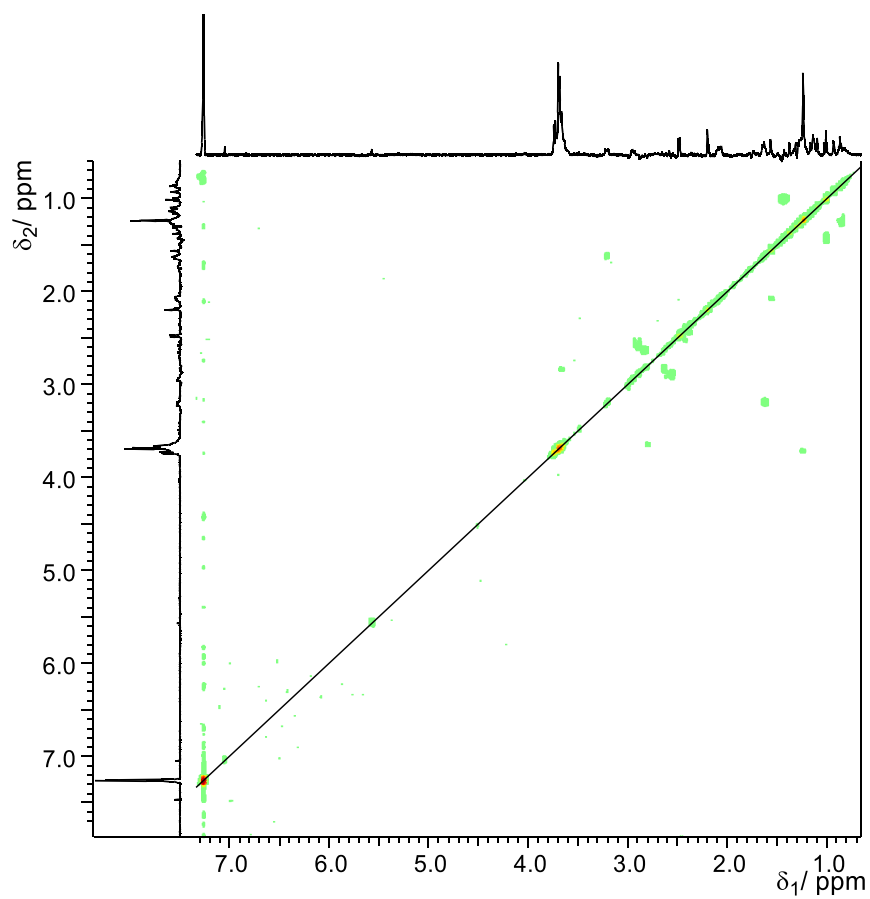

**Figure S9.**  $^1\text{H}$ - $^1\text{H}$ -pQF-COSY spectrum of **Ni-1<sup>+</sup>** (500 MHz,  $\text{CDCl}_3$ , 278 K, 4096 x 1024 p, 16 scans).

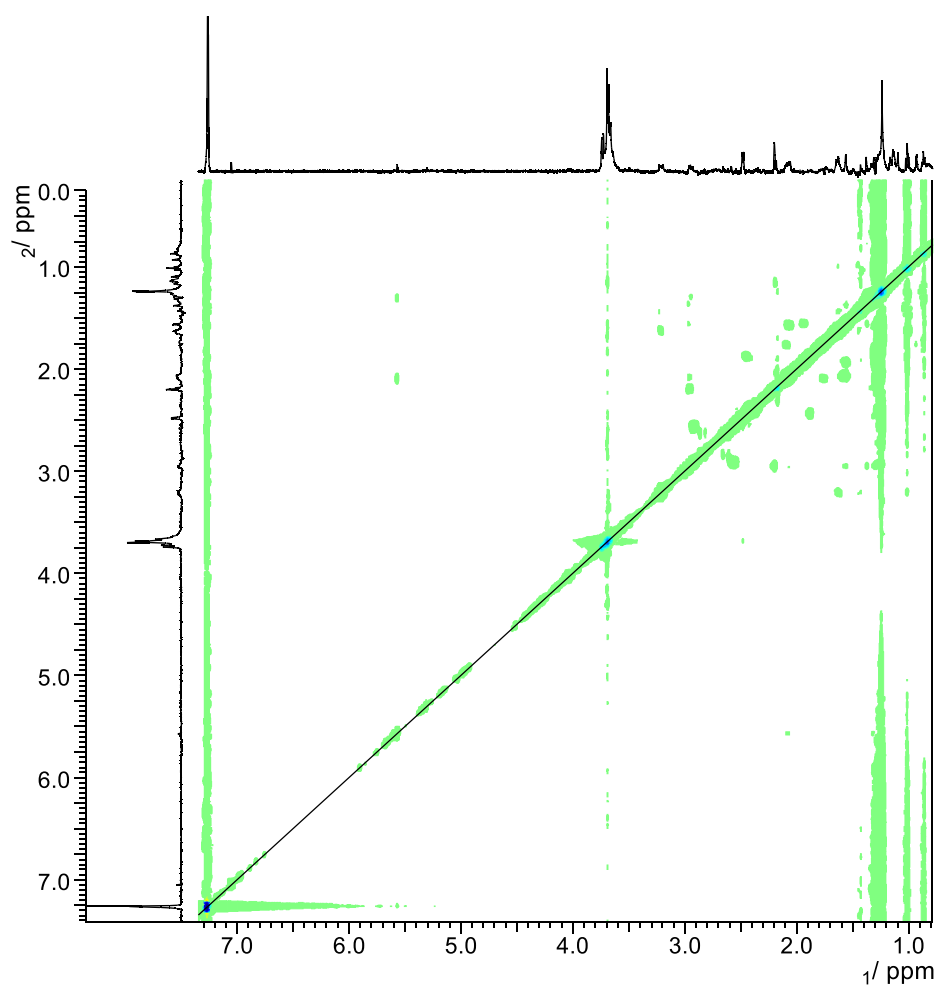

**Figure S10.**  $^1\text{H}$ - $^1\text{H}$ -ROESY spectrum of **Ni-1**<sup>+</sup> (500 MHz,  $\text{CDCl}_3$ , 278 K, 4096 x 2048 p, 88 scans).

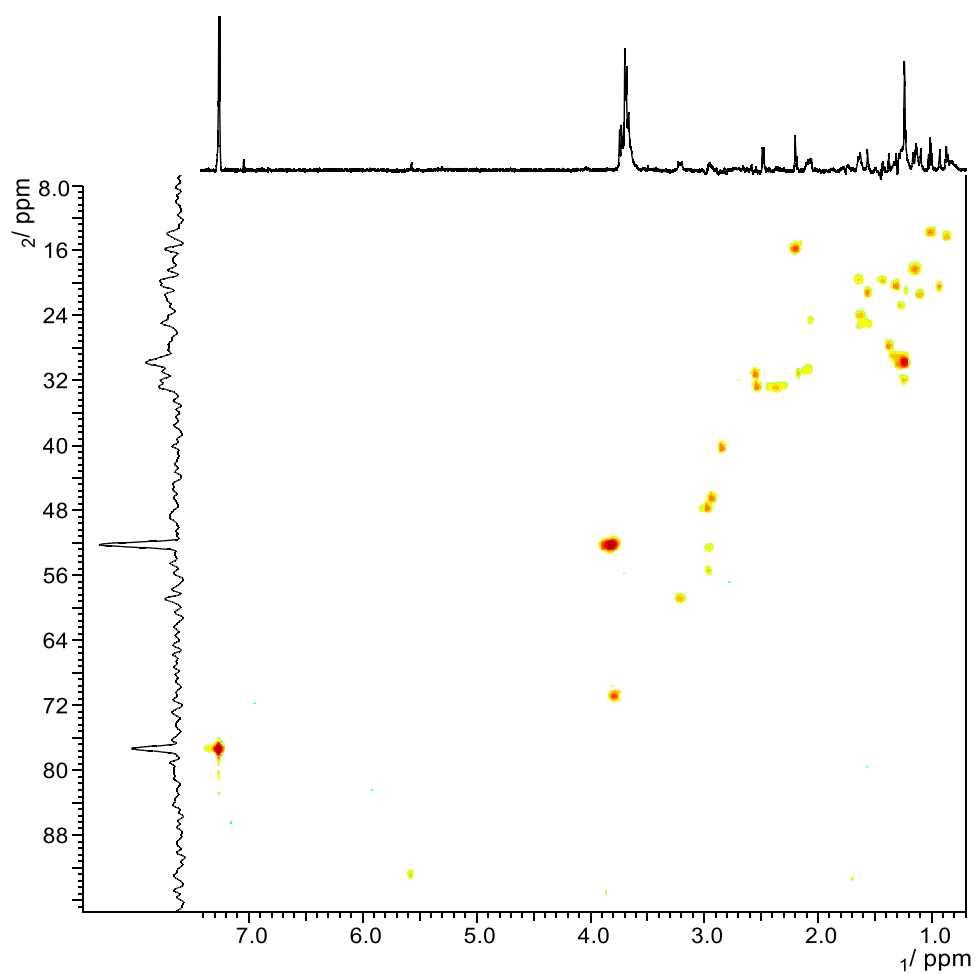

**Figure S11.**  $^1\text{H}$ - $^{13}\text{C}$ -HSQC spectrum of **Ni-1**<sup>+</sup> (500 MHz, 126 MHz,  $\text{CDCl}_3$ , 278 K, 2048 x 4069 p, 180 scans).

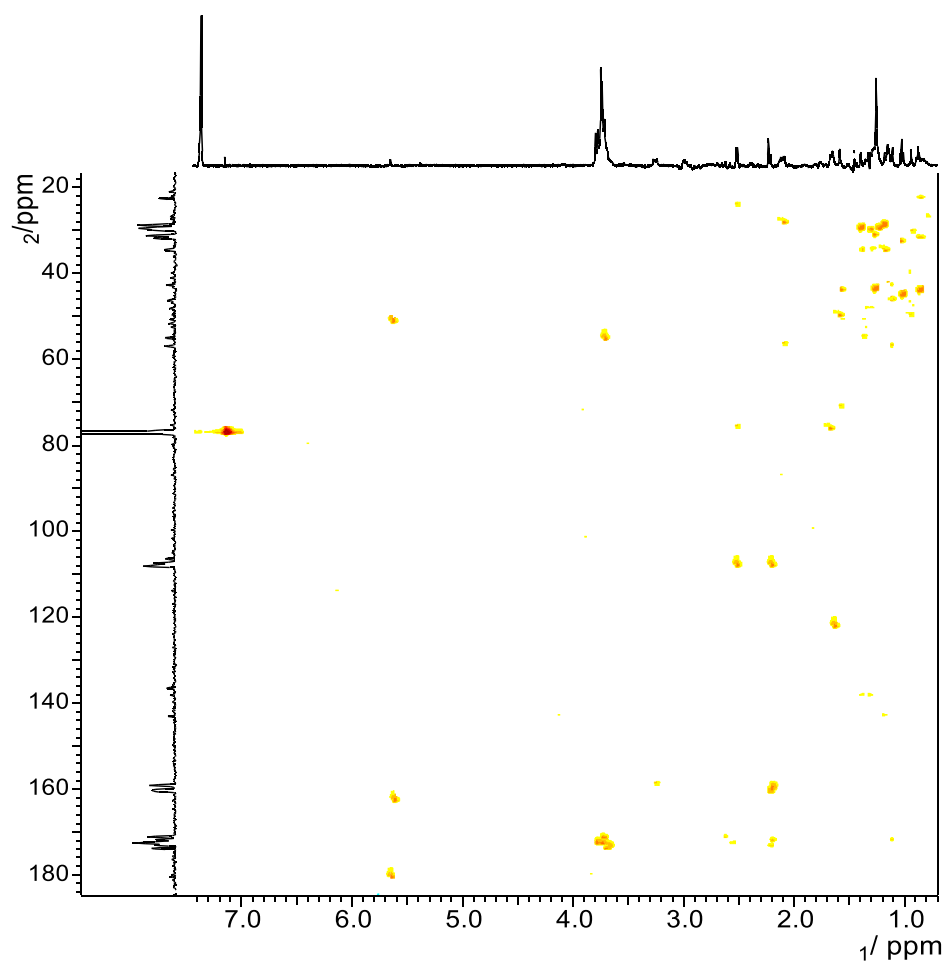

**Figure S12.**  $^1\text{H}$ - $^{13}\text{C}$ -HMBC spectrum of **Ni-1<sup>+</sup>** (500 MHz, 126 MHz,  $\text{CDCl}_3$ , 278 K, 1024 x 2048 p, 128 scans).

**Table S1.**  $^1\text{H}$ -NMR chemical shifts and  $^{13}\text{C}$ -NMR chemical shifts of **Ni-1<sup>+</sup>**.

| Atom        | $\delta(^{13}\text{C})$ / ppm | $\delta(^1\text{H})$ / ppm | Atom       | $\delta(^{13}\text{C})$ / ppm | $\delta(^1\text{H})$ / ppm |
|-------------|-------------------------------|----------------------------|------------|-------------------------------|----------------------------|
| <b>C1</b>   | 49.9                          | —                          | <b>C2A</b> | 13.8                          | 1.02                       |
| <b>C10</b>  | 92.8                          | 5.57                       | <b>C3</b>  | 58.5                          | 3.22                       |
| <b>C11</b>  | 181                           | —                          | <b>C31</b> | 24.7                          | 2.07/1.63                  |
| <b>C12</b>  | 49.5                          | —                          | <b>C32</b> | 27.9                          | 1.38                       |
| <b>C12A</b> | 29.8                          | 1.24                       | <b>C33</b> | 172.6                         | —                          |
| <b>C12B</b> | 20.5                          | 0.94                       | <b>C4</b>  | 158.6                         | —                          |
| <b>C13</b>  | 30.7                          | 2.92                       | <b>C5</b>  | 76.0                          | —                          |

|             |       |             |              |             |           |
|-------------|-------|-------------|--------------|-------------|-----------|
| <b>C131</b> | 31.2  | 1.74 / 2.56 | <b>C51</b>   | 23.8        | 1.63      |
| <b>C132</b> | 34.3  | 1.26        | <b>C6</b>    | 121.4       | –         |
| <b>C133</b> | 172.6 | –           | <b>C7</b>    | 47.9        | –         |
| <b>C14</b>  | 159.8 | –           | <b>C71</b>   | 30.7        | 2.09/1.34 |
| <b>C15</b>  | 107.5 | –           | <b>C72</b>   | 172.3       | –         |
| <b>C151</b> | 15.2  | 2.2         | <b>C7A</b>   | 20.5        | 1.32      |
| <b>C16</b>  | 171.9 | –           | <b>C8</b>    | 55.2        | 3.22      |
| <b>C17</b>  | 34.5  | –           | <b>C81</b>   | 19.6        | 1.63/1.44 |
| <b>C171</b> | 28.9  | 1.34 / 1.28 | <b>C82</b>   | 30.1        | 1.01      |
| <b>C172</b> | 34.7  | 1.40 / 1.17 | <b>C83</b>   | 173.8       | –         |
| <b>C173</b> | 172.3 | –           | <b>C9</b>    | <i>n.a.</i> | –         |
| <b>C17B</b> | 18.0  | 1.12        | <b>O5</b>    | –           | 2.46      |
| <b>C18</b>  | 55.2  | 2.83        | <b>O6</b>    | –           | 2.47      |
| <b>C181</b> | 40.2  | 2.64        | <b>OC136</b> | 52.3        | 3.68      |
| <b>C182</b> | 171   |             | <b>OC176</b> | 52.3        | 3.73      |
| <b>C19</b>  | 70.6  | 3.66        | <b>OC185</b> | 52.3        | 3.68      |
| <b>C1A</b>  | 21.8  | 1.56        | <b>OC25</b>  | 52.3        | 3.66      |
| <b>C2</b>   | 44.9  |             | <b>OC36</b>  | 52.3        | 3.7       |
| <b>C21</b>  | 30.8  | 2.53/2.19   | <b>OC75</b>  | 52.3        | 3.74      |
| <b>C22</b>  | 173   |             | <b>OC86</b>  | 52.3        | 3.68      |

## EPR spectra.

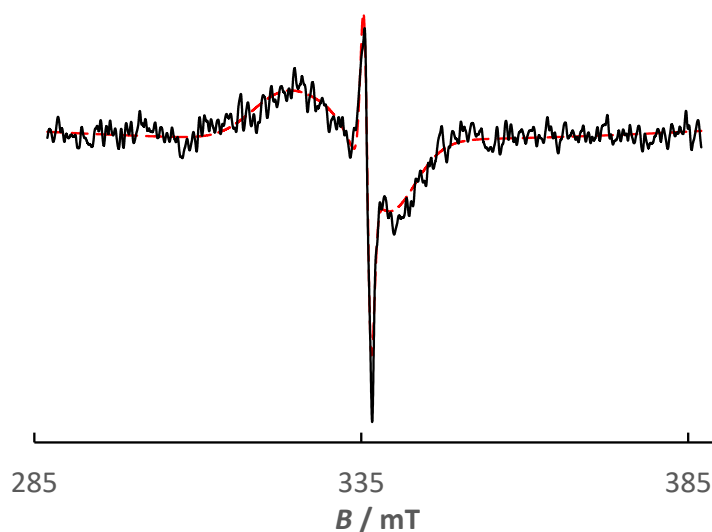

**Figure S13.** EPR spectrum of  $\text{Ni-1}^+$  in frozen MeCN at 110 K. Conditions:  $c \approx 2$  mM, microwave frequency 9.436 GHz. Broad signal:  $g_{\parallel} = 2.194$ ,  $g_{\perp} = 1.980$ , obtained from simulation with *Easyspin* [easyspin.org], represented by the fitted red curve.

*Note:* In addition to the broad signal, a relatively sharp spike (1.3 mT p-p) with a symmetric feature centered around  $g \approx 2$  is visible in S13. We assign the sharp signal with  $g \approx 2.012$  to an impurity; most likely an organic radical generated during bulk electrolysis. Integration confirms that the spin count for the sharp signal is at least 26 times smaller than for the broad signal, which relates to 4 % (Figure S14). In the simulation it contributes 0.6%.

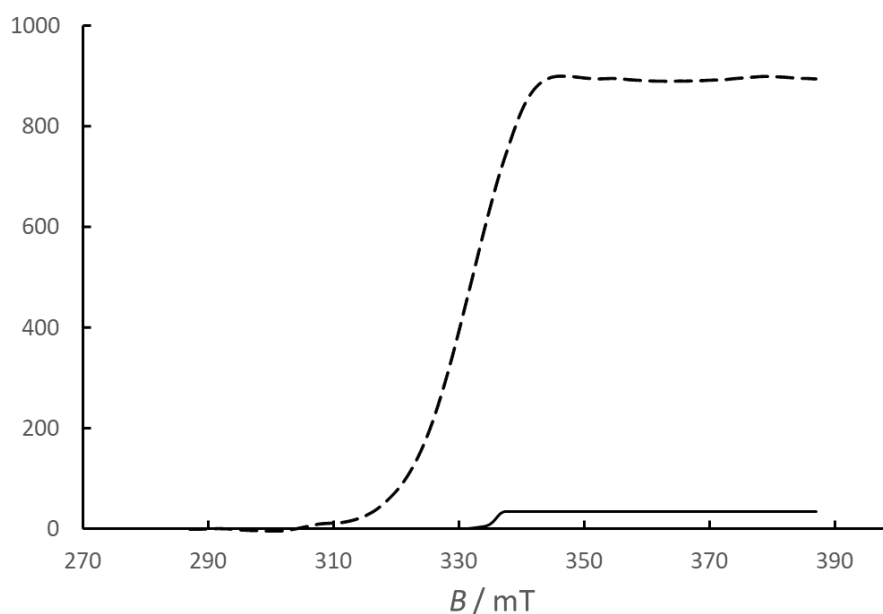

**Figure S14.** Double integration of the deconvoluted broad signal of  $\text{Ni-1}^+$  (dashed line) in comparison with the superimposed sharp signal (solid line).

## Electrochemical and Spectroelectrochemical data.

### Cyclic Voltammetry:

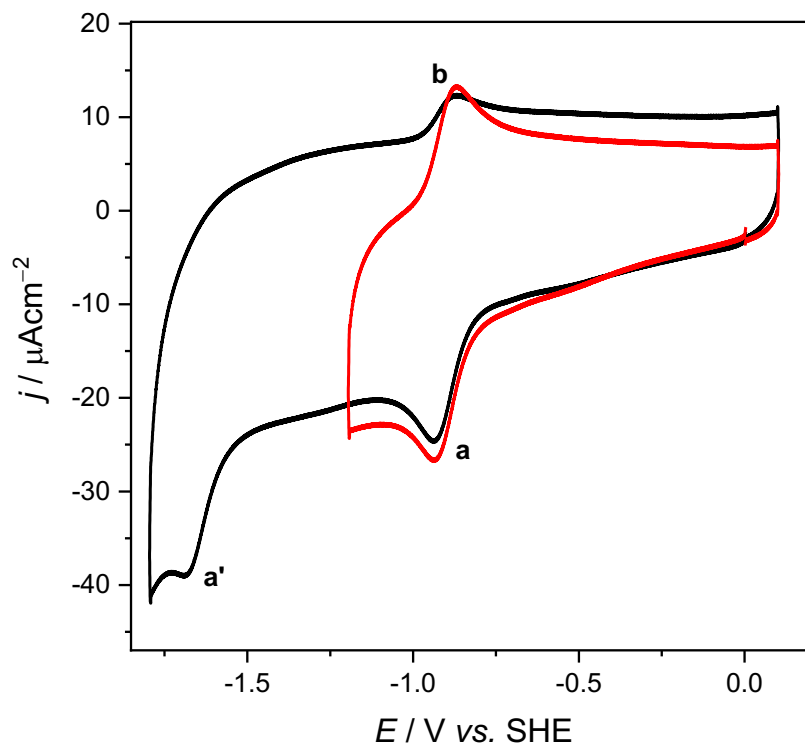

**Figure S15.** Cyclic voltammograms of **Ni-1**<sup>+</sup> (0.68 mM) in DMF ([TBAPF<sub>6</sub>] = 0.1 M). Scan rate 0.1 Vs<sup>-1</sup>. Scans start at 0.0 V and revert at -1.2 V (red trace) or -1.6 V (black trace), revert again at 1.1 V and go back to 0.0 V.

*Comment:* Signals in the anodic return scan strongly depend on the potential of scan reversal (Fig. S15). When this lies beyond -1.2 V, the anodic wave *b* is decreased with respect to the cathodic wave *a*, pointing at reductive decomposition of **Ni-1**. A second, irreversible reduction wave *a'* appears at -1.7 V (Fig. S15), when the lower return potential is sufficiently negative.

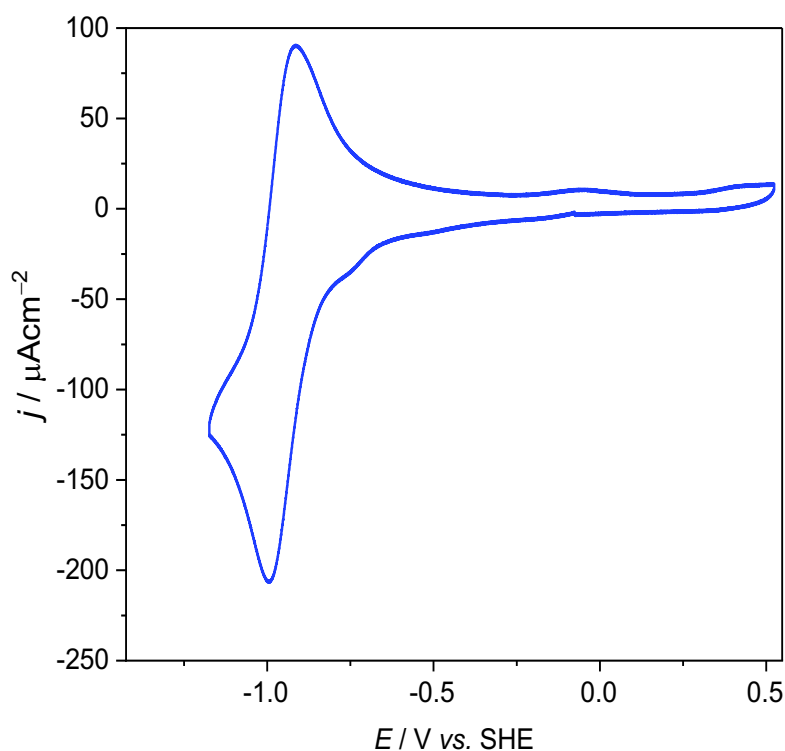

**Figure S16.** Cyclic voltammogram of **Ni-1<sup>+</sup>** (3.80 mM) in CH<sub>3</sub>CN ([TBAPF<sub>6</sub>] = 0.1 M). Scan rate 0.1 Vs<sup>-1</sup>. Scan starts at 0.0 V and reverts at -1.2 V, reverts again at 0.5 V and goes back to 0.0 V.

*Spectro-electrochemistry:*

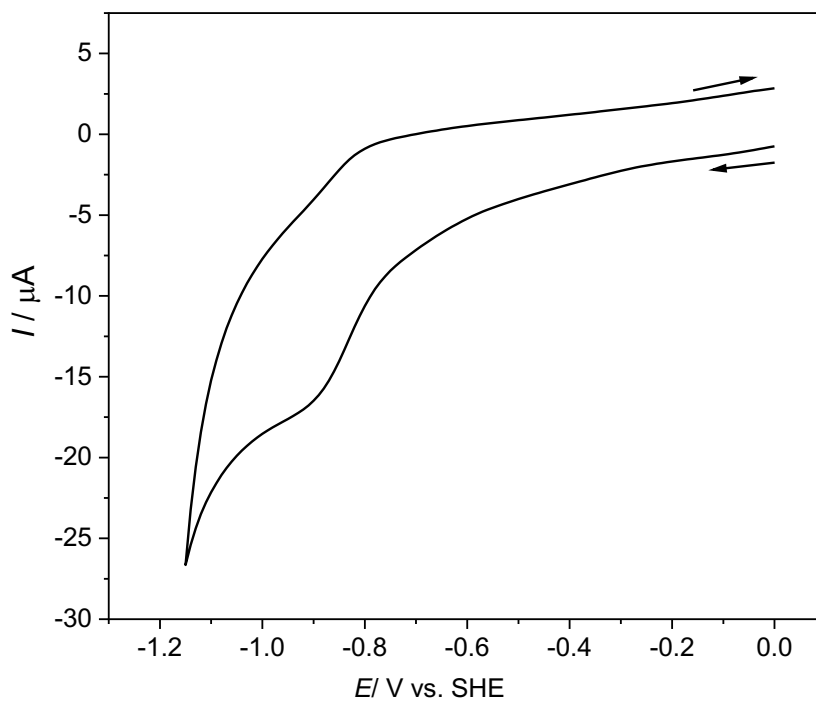

**Figure S17.** Cyclic voltammogram of **Ni-1<sup>+</sup>** (2.56 mM) in CH<sub>3</sub>CN ([TBAPF<sub>6</sub>] = 0.6 M) recorded in the SEC cell. Arrows indicate direction of scan.

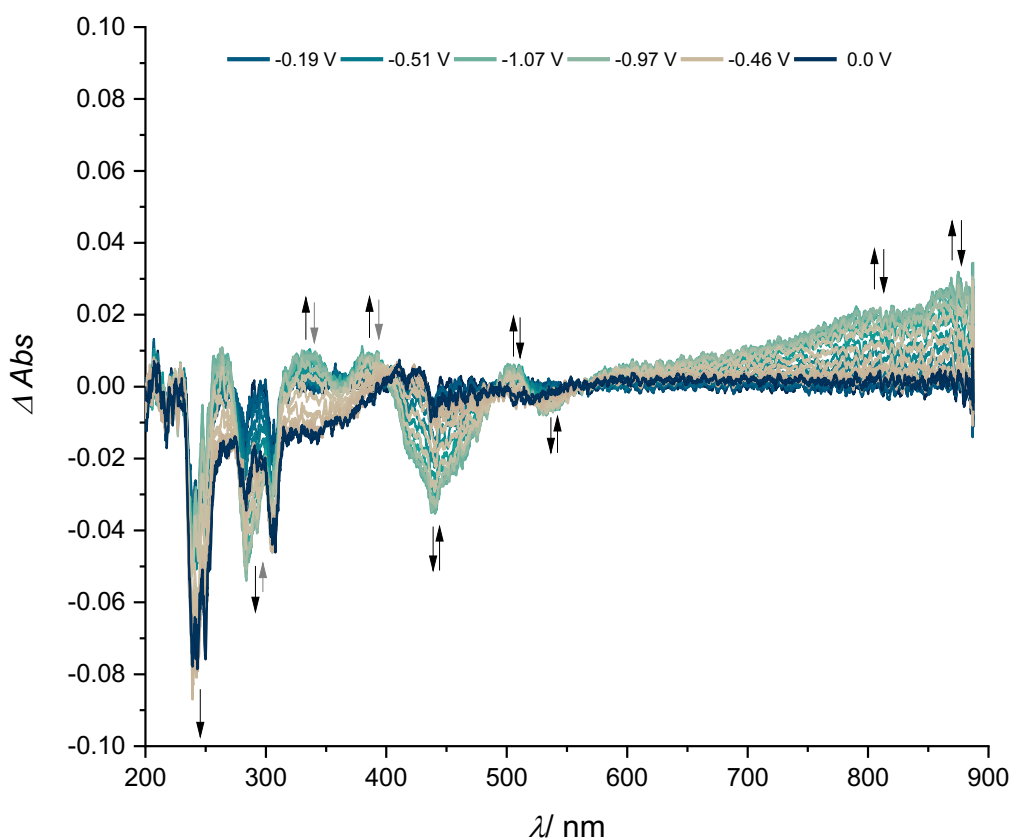

**Figure S18.** UV/Vis spectroscopic changes upon reduction of **Ni-1**<sup>+</sup> (2.56 mM) in a spectro-electrochemical cell in MeCN at the applied potential (see color chart). Arrows indicate the direction of spectral changes (grey arrows: no reversibility).

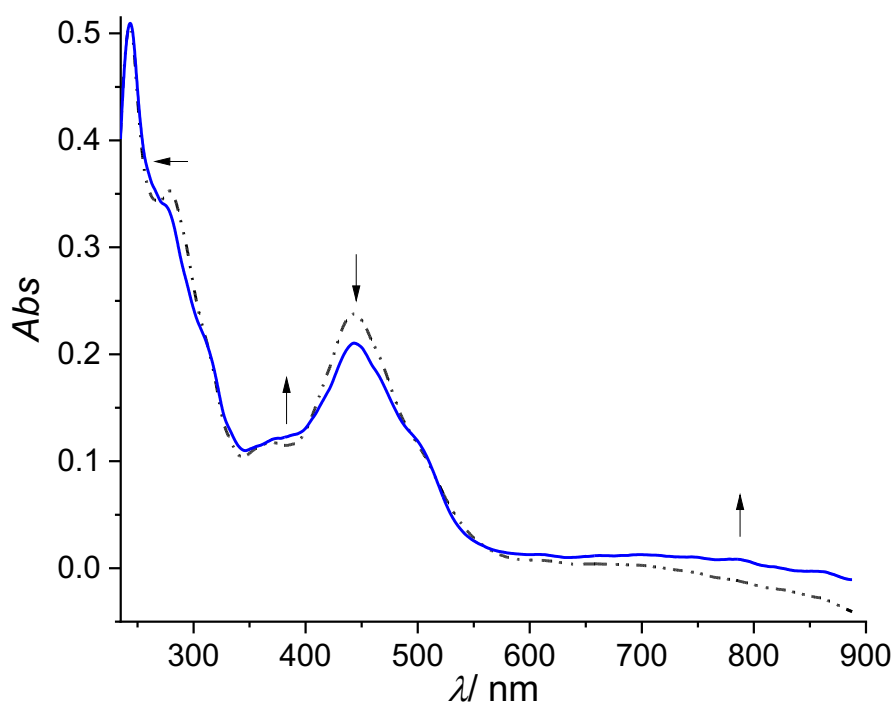

**Figure S19.** Absorption spectra (background corrected) of **Ni-1**<sup>+</sup> (at 0.0 V, black dashed-dotted line) and reduced **Ni-1** (at -1.15 V, blue solid line) recorded in the SEC cell during cyclic voltammetry. Arrows indicate spectral changes.

## Computational.

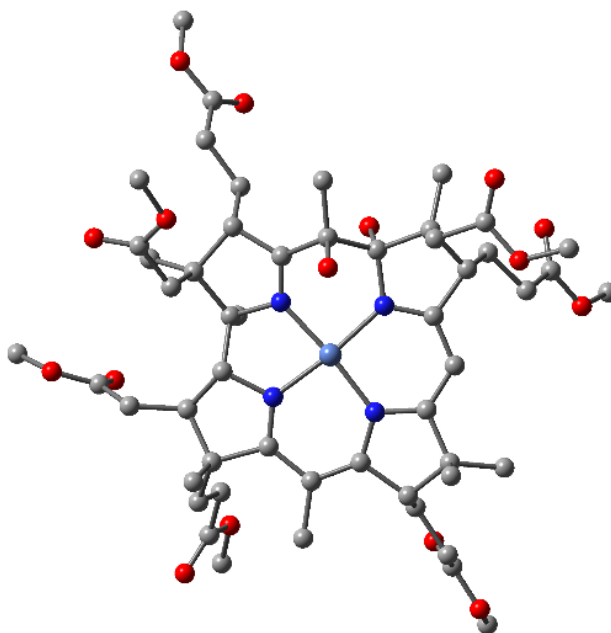

**Figure S20.** DFT optimized ground-state structure of **Ni-1<sup>+</sup>**.

**Table S2.** Coordinates of the DFT optimized ground-state structure of **Ni-1<sup>+</sup>**.

|   |             |             |             |
|---|-------------|-------------|-------------|
| C | 1.98639800  | -1.43559800 | 0.03498000  |
| C | 3.57743200  | -1.38996200 | -0.11503600 |
| C | 3.87571600  | 0.13811200  | 0.13453700  |
| C | 2.58009400  | 0.77236500  | -0.32422000 |
| C | 2.39742000  | 2.20635500  | -0.85654400 |
| C | 1.14765900  | 2.81980600  | -0.13907600 |
| C | 0.79748600  | 4.35098500  | -0.39169800 |
| C | -0.72820400 | 4.33591300  | -0.04629000 |
| C | -1.11125700 | 2.93990800  | -0.48358900 |
| C | -2.42203800 | 2.62608900  | -0.88433800 |
| C | -2.84752800 | 1.37632000  | -1.26390200 |
| C | -4.22134500 | 1.10175200  | -1.86063100 |
| C | -4.34860500 | -0.42213400 | -1.58237700 |
| C | -2.88521200 | -0.85221700 | -1.50724800 |
| C | -2.47093400 | -2.16517100 | -1.64112200 |
| C | -1.10660800 | -2.53031100 | -1.38404700 |
| C | -0.51583500 | -3.95466200 | -1.47480500 |

|   |             |             |             |
|---|-------------|-------------|-------------|
| C | 0.82276600  | -3.76291500 | -0.68306700 |
| C | 1.16691600  | -2.29031800 | -0.97560100 |
| N | 1.59128400  | -0.04138600 | -0.34072700 |
| N | -0.09094500 | 2.09520800  | -0.50105400 |
| N | -2.09193800 | 0.23844800  | -1.21031800 |
| N | -0.17401000 | -1.65245100 | -1.08070300 |
| C | 1.50798600  | -1.69370000 | 1.47602400  |
| C | 4.30970800  | -2.34593200 | 0.83728600  |
| C | 4.25881300  | 0.58527400  | 1.57930000  |
| C | 5.77502800  | 0.61852600  | 1.80229000  |
| C | 6.15291800  | 1.05997300  | 3.20218300  |
| O | 5.37123700  | 1.41589800  | 4.06835900  |
| O | 7.48507700  | 1.01745600  | 3.38123700  |
| C | 7.98332700  | 1.42792900  | 4.67462600  |
| C | 3.66708100  | 3.04359500  | -0.66102300 |
| O | 2.09569000  | 2.07571400  | -2.25238900 |
| O | 1.40718400  | 2.66645100  | 1.26635200  |
| C | 1.61422500  | 5.33014700  | 0.46745100  |
| C | 0.93262700  | 4.71456200  | -1.91168900 |
| C | -1.09112100 | 4.63983300  | 1.43255700  |
| C | -2.59889400 | 4.71265200  | 1.69346300  |
| C | -2.92924700 | 5.16763100  | 3.10096000  |
| O | -2.12239400 | 5.52760400  | 3.94219800  |
| O | -4.25681800 | 5.13295800  | 3.32266600  |
| C | -4.71167300 | 5.55844500  | 4.62653600  |
| C | -5.34010000 | 1.99791400  | -1.31108100 |
| C | -4.11793800 | 1.32559900  | -3.39468700 |
| C | -5.06465100 | -0.83319900 | -0.26430400 |
| C | -3.48761300 | -3.21962500 | -2.04873500 |
| C | -0.26460100 | -4.26631300 | -2.97462900 |
| C | -1.33996800 | -5.10856800 | -0.84637000 |
| C | -1.85550200 | -4.87190000 | 0.57864200  |

|          |             |             |             |
|----------|-------------|-------------|-------------|
| <b>C</b> | -2.74261700 | -5.99692500 | 1.07471700  |
| <b>O</b> | -3.02993700 | -7.00534600 | 0.45142600  |
| <b>O</b> | -3.18648400 | -5.74893300 | 2.32054500  |
| <b>C</b> | -4.04097800 | -6.74862400 | 2.91984200  |
| <b>C</b> | 1.88943200  | -4.83593400 | -0.96697600 |
| <b>C</b> | 2.51994700  | -5.43872400 | 0.27739700  |
| <b>O</b> | 2.06692600  | -5.36524500 | 1.40745400  |
| <b>O</b> | 3.63465400  | -6.11949500 | -0.03125400 |
| <b>C</b> | 4.29016100  | -6.82782600 | 1.04732100  |
| <b>H</b> | -4.85817100 | -0.90384300 | -2.42108000 |
| <b>H</b> | 0.57120400  | -3.83068000 | 0.37738800  |
| <b>H</b> | 1.63030300  | -2.20233400 | -1.96329500 |
| <b>H</b> | 1.78406400  | -2.69490300 | 1.81482100  |
| <b>H</b> | 0.41864500  | -1.60402800 | 1.52763300  |
| <b>H</b> | 5.39231200  | -2.26547900 | 0.71632700  |
| <b>H</b> | 4.07244700  | -2.16114900 | 1.88612700  |
| <b>H</b> | 4.04890300  | -3.38435900 | 0.61809800  |
| <b>H</b> | 3.79273800  | -0.06680200 | 2.32046100  |
| <b>H</b> | 3.85239400  | 1.58037000  | 1.77491800  |
| <b>H</b> | 6.25638900  | 1.30931000  | 1.09757400  |
| <b>H</b> | 6.23761800  | -0.35837800 | 1.62389000  |
| <b>H</b> | 9.06561600  | 1.31971800  | 4.61271700  |
| <b>H</b> | 7.71141100  | 2.46785300  | 4.87070200  |
| <b>H</b> | 7.57644300  | 0.78317300  | 5.45715400  |
| <b>H</b> | 3.58700900  | 3.99245300  | -1.19038400 |
| <b>H</b> | 3.86040700  | 3.25372600  | 0.39216800  |
| <b>H</b> | 4.53544400  | 2.52066500  | -1.07255400 |
| <b>H</b> | 2.92460000  | 1.99803100  | -2.75455000 |
| <b>H</b> | 0.90945500  | 1.89418600  | 1.58259300  |
| <b>H</b> | 1.14846200  | 6.32061500  | 0.45042500  |
| <b>H</b> | 1.66982600  | 4.99952300  | 1.50535600  |
| <b>H</b> | 2.63144900  | 5.45276900  | 0.08987700  |
| <b>H</b> | 0.30324900  | 4.05345000  | -2.51145500 |
| <b>H</b> | 1.96005100  | 4.57609700  | -2.24308100 |

|          |             |             |             |
|----------|-------------|-------------|-------------|
| <b>H</b> | -0.65393800 | 5.60911800  | 1.68876600  |
| <b>H</b> | -0.63438000 | 3.90308700  | 2.09834600  |
| <b>H</b> | -3.08930600 | 3.74565800  | 1.53633000  |
| <b>H</b> | -3.08621400 | 5.41376600  | 1.00172000  |
| <b>H</b> | -3.88940800 | 2.37291900  | -3.61910600 |
| <b>H</b> | -3.33708900 | 0.70028000  | -3.84164600 |
| <b>H</b> | -5.07318600 | 1.07119100  | -3.86866200 |
| <b>H</b> | -3.07241400 | -3.92689600 | -2.76833100 |
| <b>H</b> | -4.35152000 | -2.76940900 | -2.53728900 |
| <b>H</b> | -3.87086500 | -3.80088900 | -1.20157400 |
| <b>H</b> | -1.19347100 | -4.21674600 | -3.54861100 |
| <b>H</b> | 0.13787700  | -5.27651700 | -3.10157900 |
| <b>H</b> | 0.43977300  | -3.56004800 | -3.42627000 |
| <b>H</b> | -0.69389400 | -5.99554500 | -0.84067500 |
| <b>H</b> | -2.17628500 | -5.37462800 | -1.49400000 |
| <b>H</b> | -2.42667300 | -3.93878100 | 0.65892900  |
| <b>H</b> | -1.03444700 | -4.77617300 | 1.29859600  |
| <b>H</b> | -4.28122900 | -6.36421300 | 3.91056500  |
| <b>H</b> | -4.94939100 | -6.87410000 | 2.32580700  |
| <b>H</b> | -3.51153300 | -7.70141900 | 2.99515700  |
| <b>H</b> | 2.67977300  | -4.49797400 | -1.64195300 |
| <b>H</b> | 1.43996300  | -5.69396100 | -1.48312700 |
| <b>H</b> | 5.15314700  | -7.30945200 | 0.58931300  |
| <b>H</b> | 4.60681500  | -6.12562400 | 1.82169900  |
| <b>H</b> | 3.61300500  | -7.57221300 | 1.47238800  |
| <b>H</b> | -4.67393800 | -1.80285900 | 0.05889700  |
| <b>H</b> | -4.80767700 | -0.12844700 | 0.53435400  |
| <b>H</b> | -5.79588300 | 5.45379200  | 4.60088100  |
| <b>H</b> | -4.28234800 | 4.92065600  | 5.40285700  |
| <b>H</b> | -4.43038200 | 6.59937100  | 4.80359300  |
| <b>H</b> | -3.12641100 | 3.44542000  | -0.94165500 |
| <b>H</b> | -6.29533600 | 1.73913000  | -1.77937800 |
| <b>H</b> | -5.44992700 | 1.92208600  | -0.22514000 |
| <b>H</b> | -5.14624400 | 3.04774700  | -1.55481600 |

|           |              |             |             |
|-----------|--------------|-------------|-------------|
| <b>C</b>  | 0.58499200   | 6.15467500  | -2.24391400 |
| <b>O</b>  | 1.37247300   | 7.08642600  | -2.20367600 |
| <b>O</b>  | -0.69921600  | 6.29842200  | -2.62289000 |
| <b>C</b>  | -1.13027400  | 7.63232800  | -2.97817700 |
| <b>H</b>  | -2.18087200  | 7.53191800  | -3.24832500 |
| <b>H</b>  | -1.01378200  | 8.30650100  | -2.12649800 |
| <b>H</b>  | -0.54814200  | 8.00061200  | -3.82616500 |
| <b>H</b>  | -1.26067600  | 5.06761500  | -0.66187700 |
| <b>H</b>  | 1.93122900   | -0.96734000 | 2.17236900  |
| <b>C</b>  | 3.99427000   | -1.71315700 | -1.59128000 |
| <b>H</b>  | 3.45189400   | -1.06911200 | -2.28887900 |
| <b>H</b>  | 3.74518000   | -2.75047200 | -1.82045200 |
| <b>C</b>  | 5.47908300   | -1.58174800 | -1.88732900 |
| <b>O</b>  | 6.31125800   | -2.44592300 | -1.66808800 |
| <b>O</b>  | 5.77871500   | -0.39651500 | -2.44927500 |
| <b>C</b>  | 7.16628400   | -0.16966700 | -2.79316000 |
| <b>H</b>  | 7.19272900   | 0.82603500  | -3.23391500 |
| <b>H</b>  | 7.78801700   | -0.21218400 | -1.89615100 |
| <b>H</b>  | 7.49903600   | -0.92002300 | -3.51383700 |
| <b>H</b>  | 4.68451200   | 0.46372000  | -0.52479000 |
| <b>Ni</b> | -0.23058300  | 0.20201300  | -0.81489900 |
| <b>C</b>  | -6.58654200  | -0.95859900 | -0.39589600 |
| <b>H</b>  | -7.05908400  | -0.01398900 | -0.68362500 |
| <b>H</b>  | -6.84834000  | -1.67475000 | -1.18592900 |
| <b>C</b>  | -7.25257000  | -1.42498000 | 0.88328400  |
| <b>O</b>  | -6.68443600  | -1.66130900 | 1.93669200  |
| <b>O</b>  | -8.58277000  | -1.55096700 | 0.72006100  |
| <b>C</b>  | -9.34242800  | -1.98929800 | 1.86861600  |
| <b>H</b>  | -10.37719700 | -2.03004700 | 1.53000400  |
| <b>H</b>  | -9.00416500  | -2.97715300 | 2.19043700  |
| <b>H</b>  | -9.23415600  | -1.27440800 | 2.68784100  |

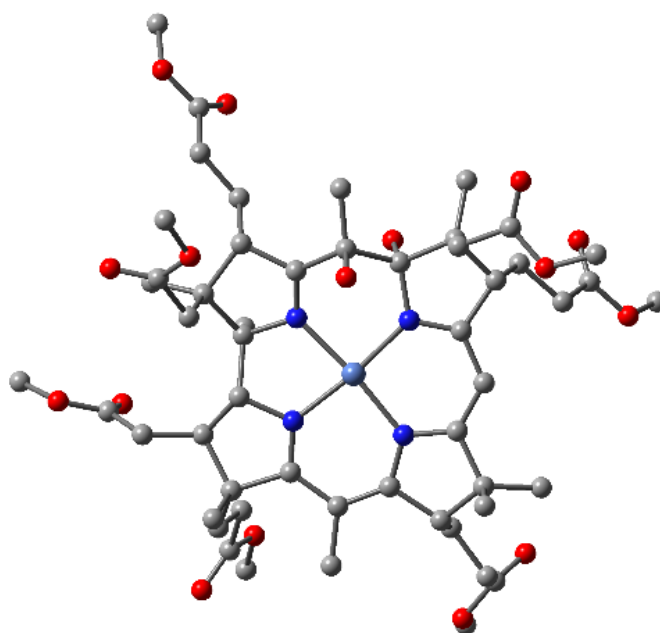

**Figure S21.** DFT optimized ground-state structure of **Ni-1**.

**Table S3.** Coordinates of the DFT optimized ground-state structure of **Ni-1**.

|   |             |             |             |
|---|-------------|-------------|-------------|
| C | 2.12471600  | -1.32319200 | 0.01514000  |
| C | 3.69971300  | -1.16930700 | -0.23696400 |
| C | 3.94019500  | 0.34104700  | 0.16474400  |
| C | 2.56993300  | 0.93815000  | -0.13138300 |
| C | 2.28885800  | 2.41864400  | -0.51403000 |
| C | 0.90787400  | 2.92462900  | 0.07690100  |
| C | 0.49903300  | 4.45799800  | -0.10240700 |
| C | -1.06099900 | 4.34646600  | 0.04872100  |
| C | -1.31598100 | 2.94792200  | -0.49044100 |
| C | -2.58799700 | 2.53734100  | -0.97000400 |
| C | -2.97469000 | 1.25268600  | -1.33138800 |
| C | -4.33094500 | 0.89810000  | -1.95068900 |
| C | -4.37995700 | -0.64058600 | -1.67195300 |
| C | -2.88879100 | -0.98718800 | -1.53207400 |
| C | -2.36751700 | -2.28016900 | -1.62016900 |
| C | -0.97310900 | -2.59165700 | -1.36363300 |

|   |             |             |             |
|---|-------------|-------------|-------------|
| C | -0.30451900 | -3.98865300 | -1.47048600 |
| C | 1.04348000  | -3.71543900 | -0.70585300 |
| C | 1.28528600  | -2.21497300 | -0.98706700 |
| N | 1.63577800  | 0.06594600  | -0.19819300 |
| N | -0.23701300 | 2.17936900  | -0.45786600 |
| N | -2.18526900 | 0.15270200  | -1.23467500 |
| N | -0.08430200 | -1.66623800 | -1.07026400 |
| C | 1.77474700  | -1.71154300 | 1.46581900  |
| C | 4.56007400  | -2.17899500 | 0.53620300  |
| C | 4.41283900  | 0.64100900  | 1.61888500  |
| C | 5.93717600  | 0.74929000  | 1.73861400  |
| C | 6.40298100  | 1.07339500  | 3.14371900  |
| O | 5.67848300  | 1.28666200  | 4.10183000  |
| O | 7.74675700  | 1.10477300  | 3.21530100  |
| C | 8.32420500  | 1.41546600  | 4.50305200  |
| C | 3.44852700  | 3.32673000  | -0.07900700 |
| O | 2.19099100  | 2.41984200  | -1.95389400 |
| O | 1.00182100  | 2.68575600  | 1.49704500  |
| C | 1.14793400  | 5.41463200  | 0.91209700  |
| C | 0.79086700  | 4.93618900  | -1.56697700 |
| C | -1.60428200 | 4.55141900  | 1.48806700  |
| C | -3.13314100 | 4.58779500  | 1.57046500  |
| C | -3.64570700 | 4.94256500  | 2.95102600  |
| O | -2.95981400 | 5.16461900  | 3.93567900  |
| O | -4.99302000 | 4.98371000  | 2.97351000  |
| C | -5.61390000 | 5.30782800  | 4.23660000  |
| C | -5.50651600 | 1.73283600  | -1.42154800 |
| C | -4.22807000 | 1.11947900  | -3.48350400 |
| C | -5.13052300 | -1.08836300 | -0.38729500 |
| C | -3.32065700 | -3.40379600 | -2.00685000 |
| C | -0.06254700 | -4.29627500 | -2.97167300 |
| C | -1.04089200 | -5.19130300 | -0.82535500 |
| C | -1.55818000 | -4.97102800 | 0.60127300  |
| C | -2.33623400 | -6.15444900 | 1.13873900  |

|          |             |             |             |
|----------|-------------|-------------|-------------|
| <b>O</b> | -2.47981900 | -7.22949500 | 0.57960700  |
| <b>O</b> | -2.86129500 | -5.88121900 | 2.34902600  |
| <b>C</b> | -3.61285800 | -6.93706600 | 2.98703800  |
| <b>C</b> | 2.17842000  | -4.70641900 | -1.02639000 |
| <b>C</b> | 2.82494900  | -5.34591500 | 0.19013700  |
| <b>O</b> | 2.35875800  | -5.36883800 | 1.31698000  |
| <b>O</b> | 3.98392800  | -5.94332500 | -0.13945000 |
| <b>C</b> | 4.67032500  | -6.66262800 | 0.91058300  |
| <b>H</b> | -4.83522900 | -1.14781200 | -2.52869400 |
| <b>H</b> | 0.81883900  | -3.81525600 | 0.35800300  |
| <b>H</b> | 1.72387100  | -2.10333300 | -1.98462800 |
| <b>H</b> | 2.15191200  | -2.70431000 | 1.72206200  |
| <b>H</b> | 0.68671000  | -1.71577300 | 1.58668700  |
| <b>H</b> | 5.62318700  | -2.02707400 | 0.33359600  |
| <b>H</b> | 4.40886100  | -2.12006400 | 1.61572600  |
| <b>H</b> | 4.32928400  | -3.20188000 | 0.22574700  |
| <b>H</b> | 4.04668700  | -0.11887100 | 2.31192300  |
| <b>H</b> | 3.97010000  | 1.58075200  | 1.95892600  |
| <b>H</b> | 6.32412500  | 1.53462100  | 1.07540900  |
| <b>H</b> | 6.43765100  | -0.17436300 | 1.42697400  |
| <b>H</b> | 9.40235600  | 1.39059800  | 4.34798600  |
| <b>H</b> | 8.00580500  | 2.40831500  | 4.82988200  |
| <b>H</b> | 8.02470000  | 0.66761600  | 5.24115100  |
| <b>H</b> | 3.37610400  | 4.30139000  | -0.56192300 |
| <b>H</b> | 3.45835300  | 3.47805300  | 1.00195400  |
| <b>H</b> | 4.41005800  | 2.89612500  | -0.37426700 |
| <b>H</b> | 3.08758000  | 2.42004700  | -2.32992300 |
| <b>H</b> | 0.71935700  | 1.76430100  | 1.63494900  |
| <b>H</b> | 0.63335600  | 6.38114200  | 0.90623700  |
| <b>H</b> | 1.09985100  | 5.01104400  | 1.92462800  |
| <b>H</b> | 2.19468700  | 5.61379000  | 0.67255100  |
| <b>H</b> | 0.28924700  | 4.27398500  | -2.27508100 |
| <b>H</b> | 1.85908000  | 4.88679400  | -1.77337000 |
| <b>H</b> | -1.22528800 | 5.50602200  | 1.86575700  |

|          |             |             |             |
|----------|-------------|-------------|-------------|
| <b>H</b> | -1.21424700 | 3.77357600  | 2.15013200  |
| <b>H</b> | -3.57669200 | 3.62385100  | 1.29610400  |
| <b>H</b> | -3.55102000 | 5.31990900  | 0.86589400  |
| <b>H</b> | -4.05658200 | 2.17752900  | -3.71189600 |
| <b>H</b> | -3.40537500 | 0.53870900  | -3.91628500 |
| <b>H</b> | -5.15972500 | 0.80907800  | -3.97304900 |
| <b>H</b> | -2.87803400 | -4.08817100 | -2.73431200 |
| <b>H</b> | -4.22625600 | -3.01596200 | -2.47466400 |
| <b>H</b> | -3.64836500 | -4.01162800 | -1.15306700 |
| <b>H</b> | -1.00260800 | -4.28931300 | -3.53029200 |
| <b>H</b> | 0.38425700  | -5.28730200 | -3.11158700 |
| <b>H</b> | 0.60032100  | -3.55680500 | -3.43444100 |
| <b>H</b> | -0.34164200 | -6.03773900 | -0.81740500 |
| <b>H</b> | -1.86802400 | -5.51318900 | -1.46145600 |
| <b>H</b> | -2.20223900 | -4.08621100 | 0.66872800  |
| <b>H</b> | -0.73724900 | -4.79068400 | 1.30613000  |
| <b>H</b> | -3.95064400 | -6.51765200 | 3.93428200  |
| <b>H</b> | -4.46632300 | -7.22168500 | 2.36701900  |
| <b>H</b> | -2.97282500 | -7.80603000 | 3.15863200  |
| <b>H</b> | 2.96347400  | -4.27482200 | -1.65426300 |
| <b>H</b> | 1.80065700  | -5.55637000 | -1.60928200 |
| <b>H</b> | 5.56538400  | -7.06923200 | 0.44108600  |
| <b>H</b> | 4.93732900  | -5.98151000 | 1.72182600  |
| <b>H</b> | 4.03634700  | -7.46638000 | 1.29230100  |
| <b>H</b> | -4.70450900 | -2.03941800 | -0.04998800 |
| <b>H</b> | -4.95163000 | -0.36851600 | 0.42005300  |
| <b>H</b> | -6.68625100 | 5.28547100  | 4.04446100  |
| <b>H</b> | -5.34371900 | 4.56618300  | 4.99223900  |
| <b>H</b> | -5.30395100 | 6.30251500  | 4.56636700  |
| <b>H</b> | -3.33158600 | 3.32058200  | -1.06591500 |
| <b>H</b> | -6.44070700 | 1.44167200  | -1.91449300 |
| <b>H</b> | -5.64023000 | 1.64082400  | -0.33916000 |
| <b>H</b> | -5.34982100 | 2.79374700  | -1.64598500 |
| <b>C</b> | 0.38029000  | 6.36656400  | -1.85885000 |

|           |             |             |             |
|-----------|-------------|-------------|-------------|
| <b>O</b>  | 1.05895500  | 7.35271800  | -1.61597400 |
| <b>O</b>  | -0.82514700 | 6.44432700  | -2.45798900 |
| <b>C</b>  | -1.30274600 | 7.76619900  | -2.79319000 |
| <b>H</b>  | -2.27436700 | 7.61086600  | -3.26117500 |
| <b>H</b>  | -1.40314800 | 8.37266400  | -1.88987200 |
| <b>H</b>  | -0.61355400 | 8.24984300  | -3.48962300 |
| <b>H</b>  | -1.55220900 | 5.09090300  | -0.58777600 |
| <b>H</b>  | 2.18128600  | -0.99299900 | 2.18078400  |
| <b>C</b>  | 4.00519900  | -1.30023400 | -1.77043400 |
| <b>H</b>  | 3.32815400  | -0.66164800 | -2.34367700 |
| <b>H</b>  | 3.84603400  | -2.33426000 | -2.08634700 |
| <b>C</b>  | 5.42753300  | -0.96438600 | -2.17841200 |
| <b>O</b>  | 6.39106700  | -1.70044500 | -2.03859600 |
| <b>O</b>  | 5.51439100  | 0.25430700  | -2.74695400 |
| <b>C</b>  | 6.82461900  | 0.67499800  | -3.19165800 |
| <b>H</b>  | 6.67796800  | 1.66698500  | -3.61731500 |
| <b>H</b>  | 7.51492300  | 0.71624700  | -2.34597600 |
| <b>H</b>  | 7.20349900  | -0.01659700 | -3.94775600 |
| <b>H</b>  | 4.68482800  | 0.78040200  | -0.50568100 |
| <b>Ni</b> | -0.27004300 | 0.23956400  | -0.76386300 |
| <b>C</b>  | -6.65020000 | -1.29506900 | -0.58447200 |
| <b>H</b>  | -6.82242800 | -2.05093900 | -1.35681400 |
| <b>H</b>  | -7.13330700 | -0.36660500 | -0.89666000 |
| <b>C</b>  | -7.30162100 | -1.73073100 | 0.70890500  |
| <b>O</b>  | -7.57463500 | -0.98209000 | 1.63529500  |
| <b>O</b>  | -7.52469200 | -3.05763900 | 0.74879300  |
| <b>C</b>  | -8.10433200 | -3.58474900 | 1.96325400  |
| <b>H</b>  | -8.19512800 | -4.65759200 | 1.79658500  |
| <b>H</b>  | -7.44910900 | -3.38124100 | 2.81356800  |
| <b>H</b>  | -9.08638500 | -3.13805900 | 2.13626500  |

## References.

- S1 I. Noviadri, K. N. Brown, D. S. Fleming, P. T. Gulyas, P. A. Lay, A. F. Masters and L. Phillips, *J. Phys. Chem. B*, 1999, **103**, 6713-6722.
- S2 M. Krejčík, M. Daněk and F. Hartl, *J. Electroanal. Chem. Interfacial Electrochem.*, 1991, **317**, 179-187.
- S3 Gaussian 09, Revision D.01, M. J. Frisch, G. W. Trucks, H. B. Schlegel, G. E. Scuseria, M. A. Robb, J. R. Cheeseman, G. Scalmani, V. Barone, B. Mennucci, G. A. Petersson, H. Nakatsuji, M. Caricato, X. Li, H. P. Hratchian, A. F. Izmaylov, J. Bloino, G. Zheng, J. L. Sonnenberg, M. Hada, M. Ehara, K. Toyota, R. Fukuda, J. Hasegawa, M. Ishida, T. Nakajima, Y. Honda, O. Kitao, H. Nakai, T. Vreven, J. A. Montgomery, Jr., J. E. Peralta, F. Ogliaro, M. Bearpark, J. J. Heyd, E. Brothers, K. N. Kudin, V. N. Staroverov, T. Keith, R. Kobayashi, J. Normand, K. Raghavachari, A. Rendell, J. C. Burant, S. S. Iyengar, J. Tomasi, M. Cossi, N. Rega, J. M. Millam, M. Klene, J. E. Knox, J. B. Cross, V. Bakken, C. Adamo, J. Jaramillo, R. Gomperts, R. E. Stratmann, O. Yazyev, A. J. Austin, R. Cammi, C. Pomelli, J. W. Ochterski, R. L. Martin, K. Morokuma, V. G. Zakrzewski, G. A. Voth, P. Salvador, J. J. Dannenberg, S. Dapprich, A. D. Daniels, O. Farkas, J. B. Foresman, J. V. Ortiz, J. Cioslowski, and D. J. Fox, Gaussian, Inc., Wallingford CT, 2013.
- S4 A. D. Becke, *J. Chem. Phys.*, 1993, **98**, 5648-5652.
- S5 R. Ditchfield, W. J. Hehre and J. A. Pople, *J. Chem. Phys.*, 1971, **54**, 724-728.
- S6 M. Cossi, N. Rega, G. Scalmani and V. Barone, *J. Comput. Chem.*, 2003, **24**, 669-681.
- S7 R. Bauernschmitt and R. Ahlrichs, *Chem. Phys. Lett.*, 1996, **256**, 454-464.
- S8 S. M. Chemaly, M. Florczak, H. Dirr and H. M. Marques, *Inorg. Chem.*, 2011, **50**, 8719-8727.
- S9 L. Werthemann, Dissertation ETH Zürich, Juris Verlag, Zürich, 1968.
- S10 B. Kräutler and R. Štěpánek, *Helv. Chim. Acta*, 1985, **68**, 1079-1088.
- S11 C. Brenig, L. Prieto, R. Oetterli and F. Zelder, *Angew. Chem. Int. Ed.*, 2018, **57**, 16308-16312.
